# Supplementary material for: Microwave-assisted synthesis of 3-sulfenylindoles by sulfonyl hydrazides using organic ionic base-Brønsted acid
Source: Royal Society of Chemistry journal article supplement (doi:10.1039/c5ra24851e), 2016-01-01

## **Supporting Information**

# **Microwave-assisted synthesis of 3-sulfenylindoles by sulfonyl hydrazides using organic ionic base-Brønsted acid**

Rajjakfur Rahaman, Namita Devi, Kuladip Sarma and Pranjit Barman\*

*Department of Chemistry, National Institute of Technology Silchar, Silchar*

*788010, India*

\*Email: [barmanpranjit@yahoo.co.in](mailto:barmanpranjit@yahoo.co.in)

## **Table of Contents**

|                                                                       |     |
|-----------------------------------------------------------------------|-----|
| Temperature heating curves for microwave heating.....                 | S-2 |
| <sup>1</sup> H and <sup>13</sup> C NMR spectra for all compounds..... | S-5 |

### The optimization heating curves for microwave assisted synthesis:

All the synthesis processes were performed on a programmed microwave synthesis reactor (START SYNTH, Milestone). All the reaction parameters were programmed with optimized increased time, target temperature, standing time and temperature. The three different optimization temperature curves are given below (as recorded in Terminal 260):

1. 80 W, 100 °C, 10 min

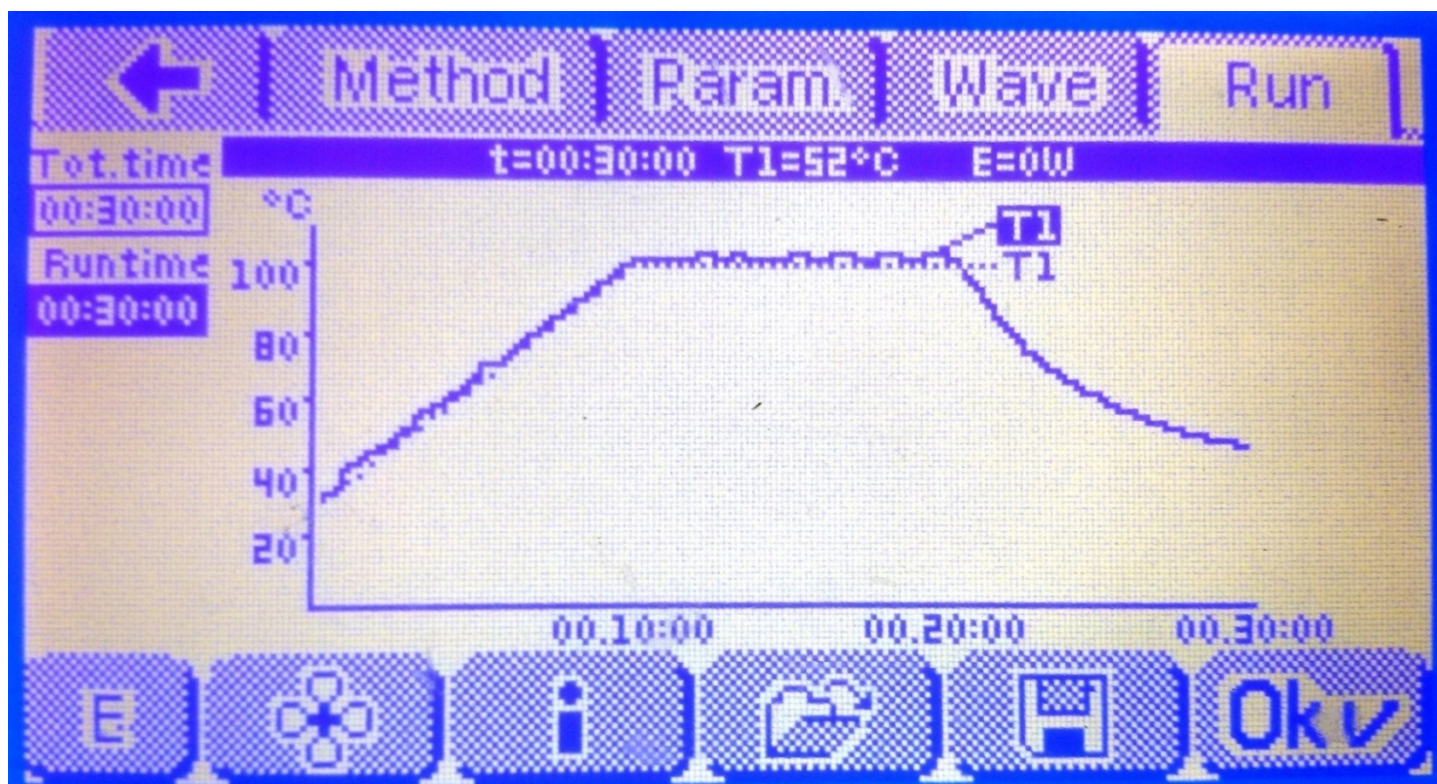

2. 80 W, 110 °C, 10 min

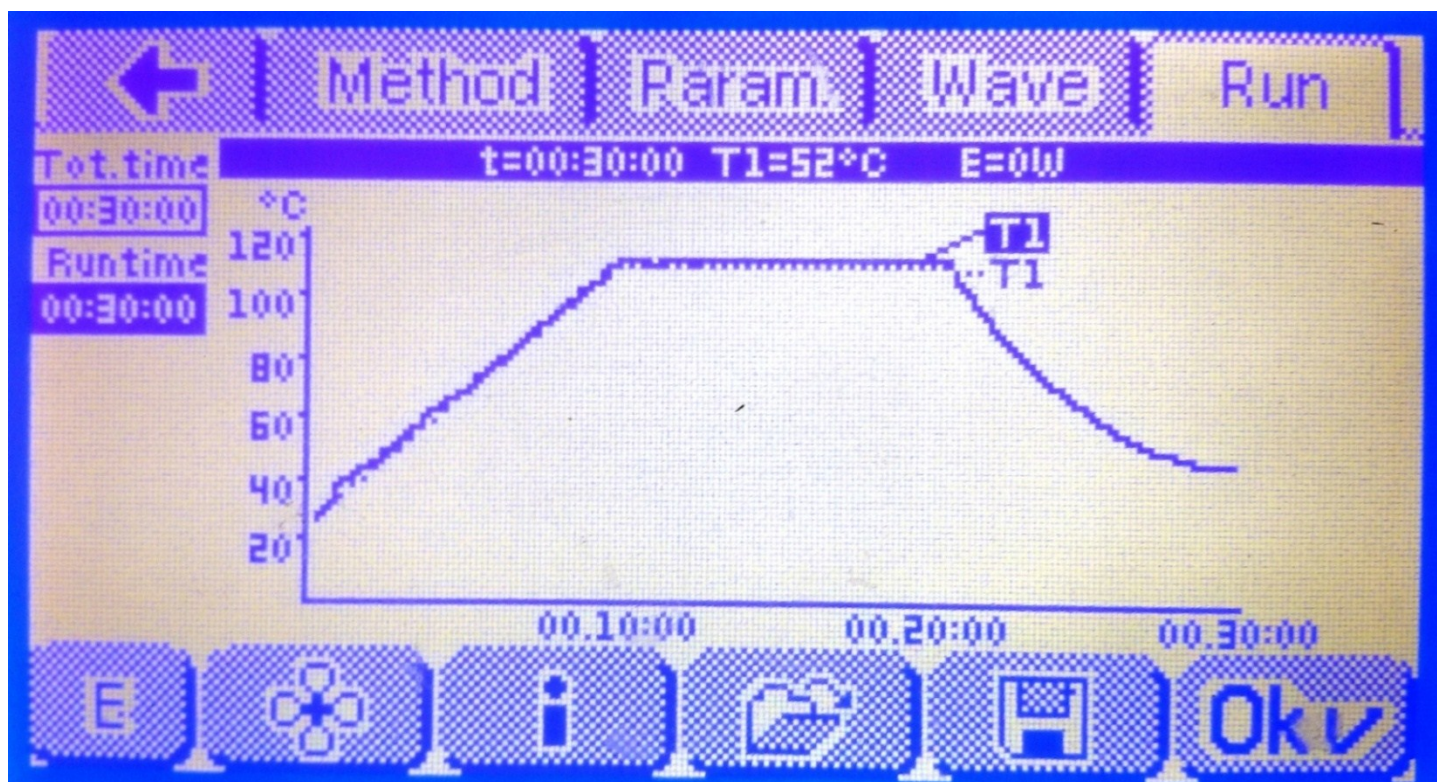



3. 80 W, 90 °C, 10 min

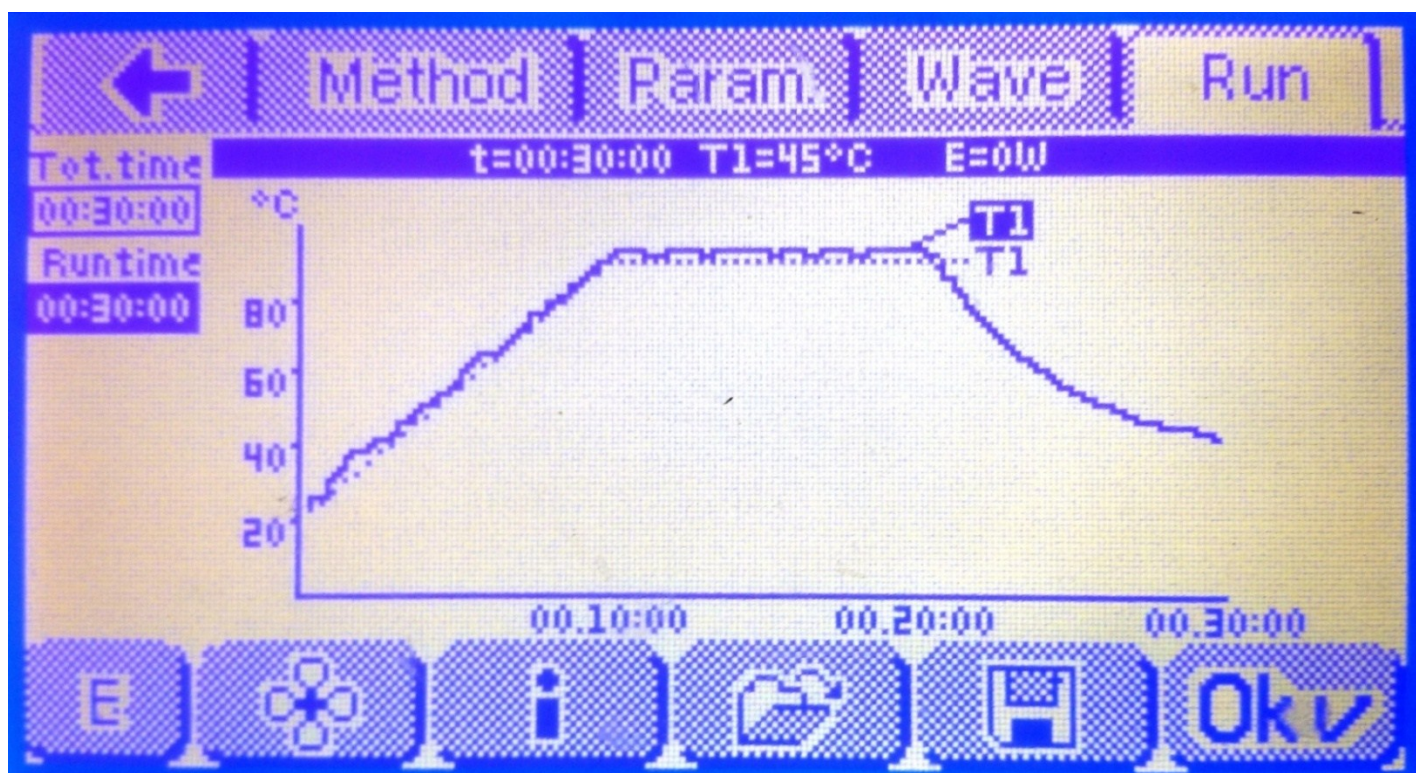

## Characterization data of the synthesized compounds

$^1\text{H}$  NMR of compound **3a** ( $\text{CDCl}_3$ , 400 MHz)

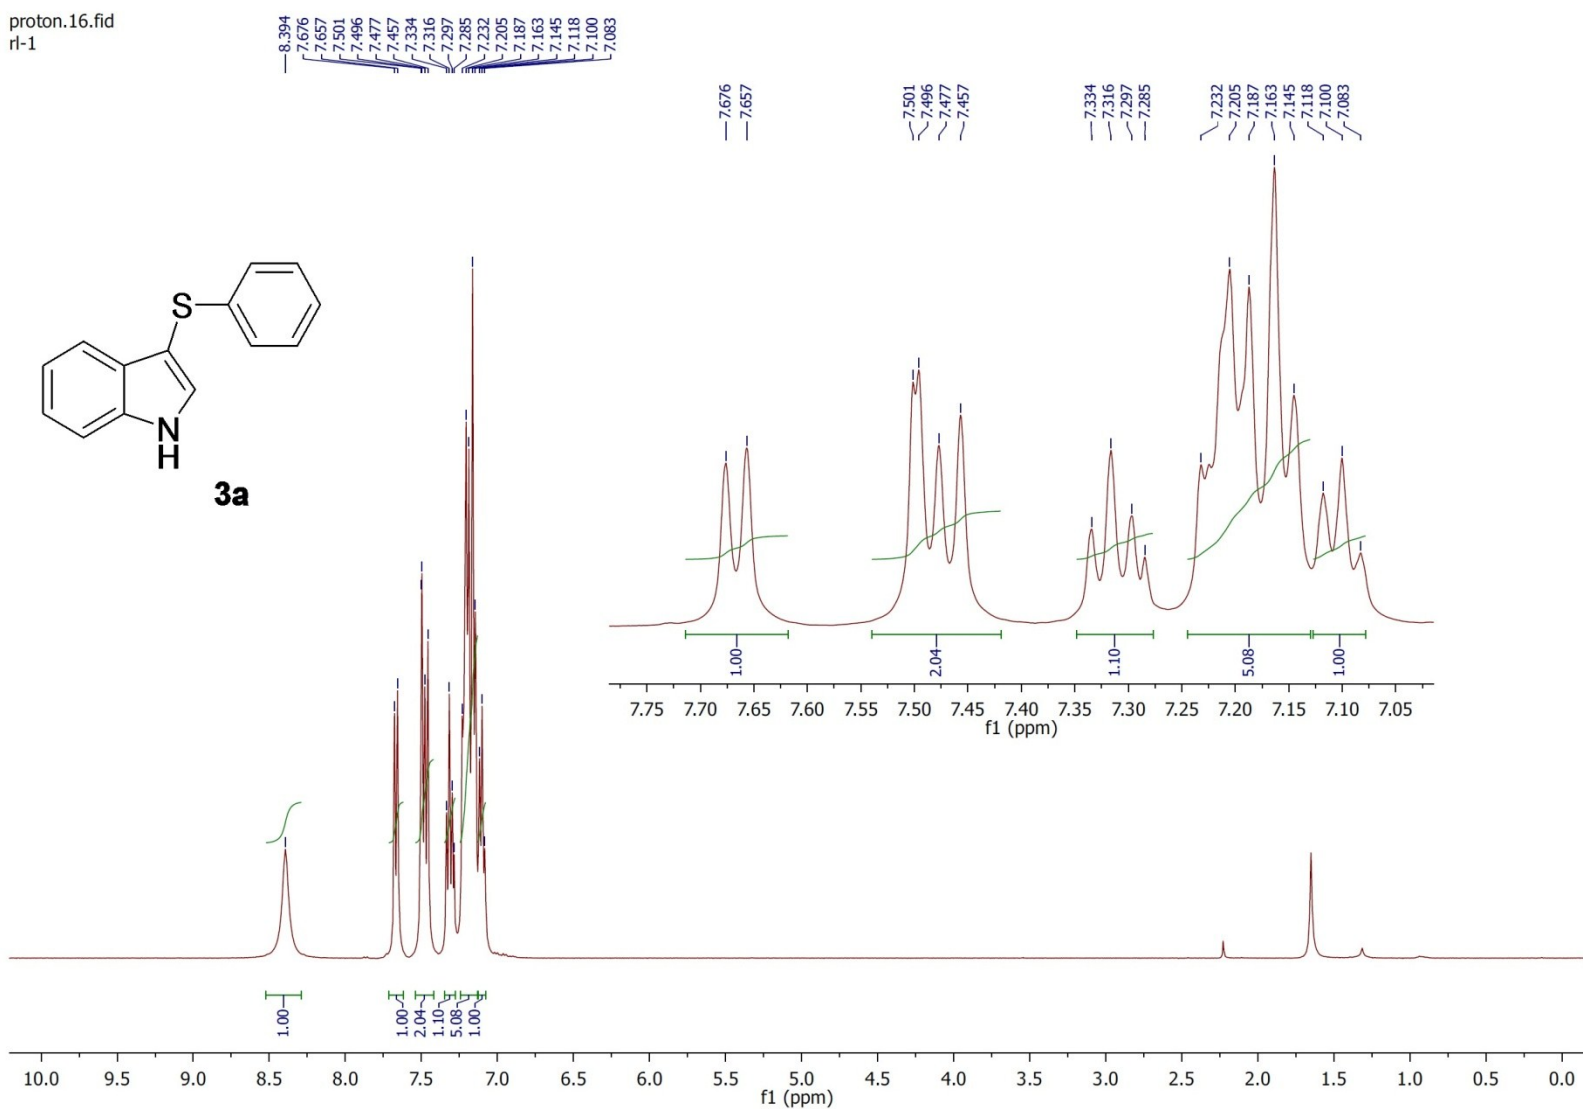

$^{13}\text{C}$  NMR of compound **3a** ( $\text{CDCl}_3$ , 100 MHz)

NMR.17.fid  
rl-1

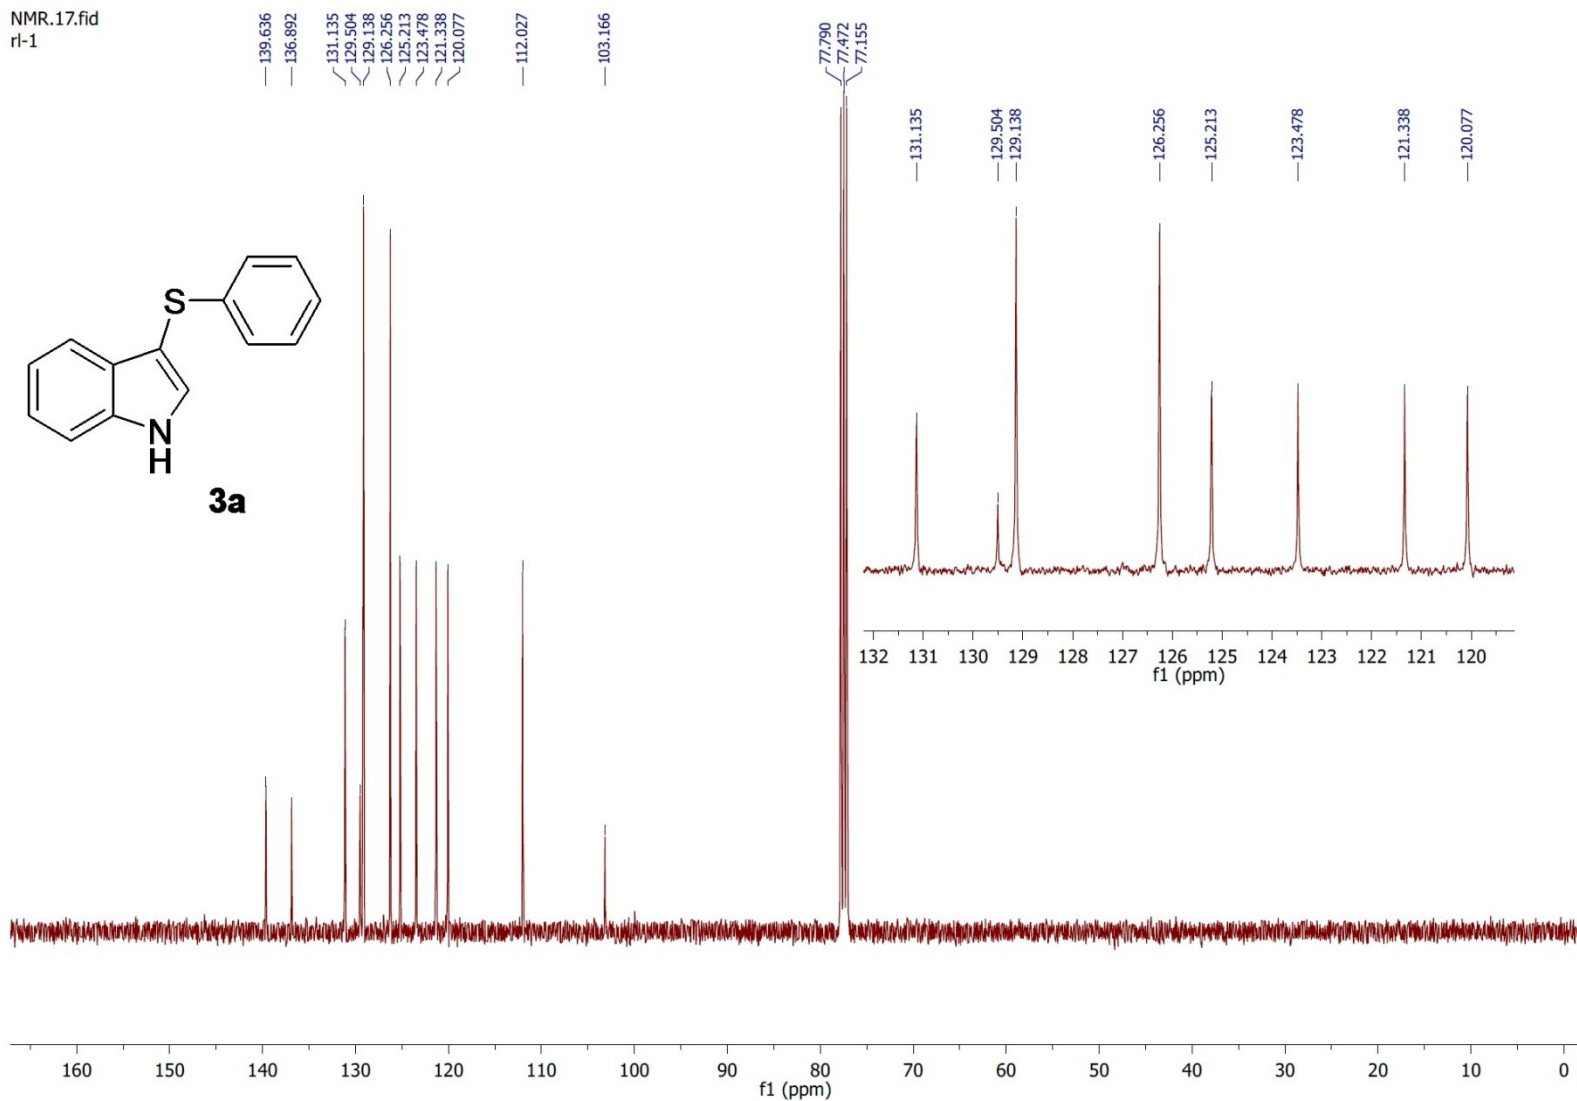

$^1\text{H}$  NMR of compound **3b** ( $\text{CDCl}_3$ , 400 MHz)

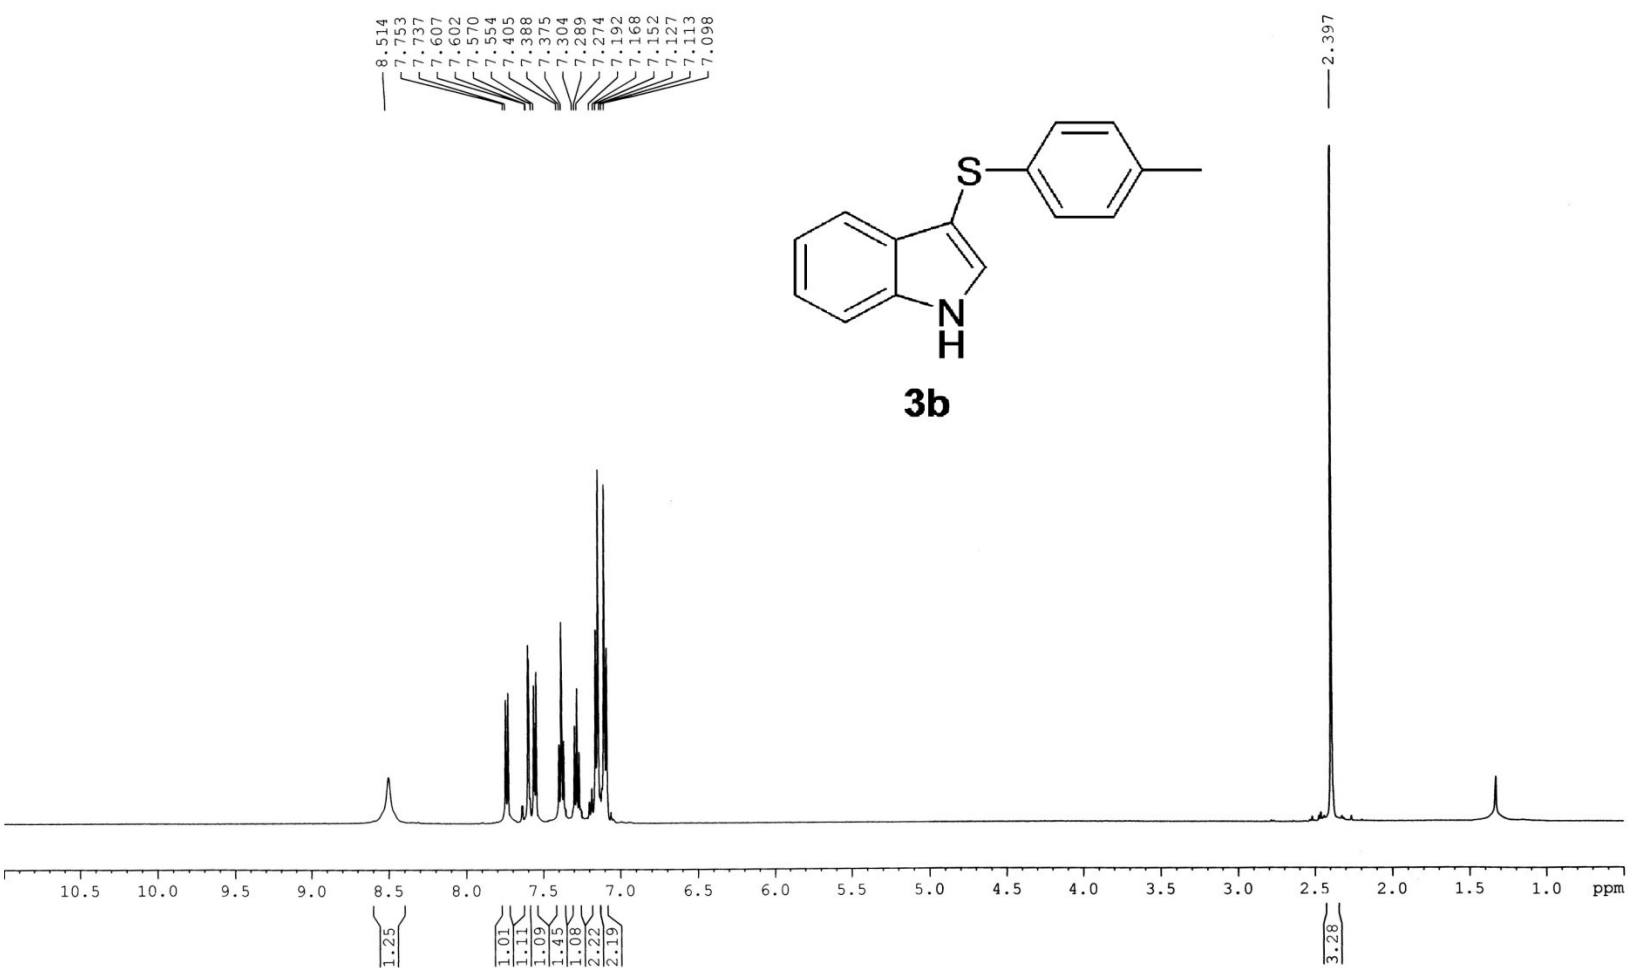

$^{13}\text{C}$  NMR of compound **3b** ( $\text{CDCl}_3$ , 125 MHz)

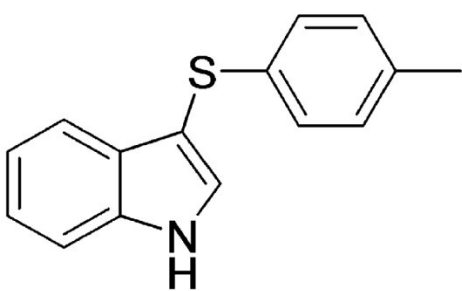

**3b**

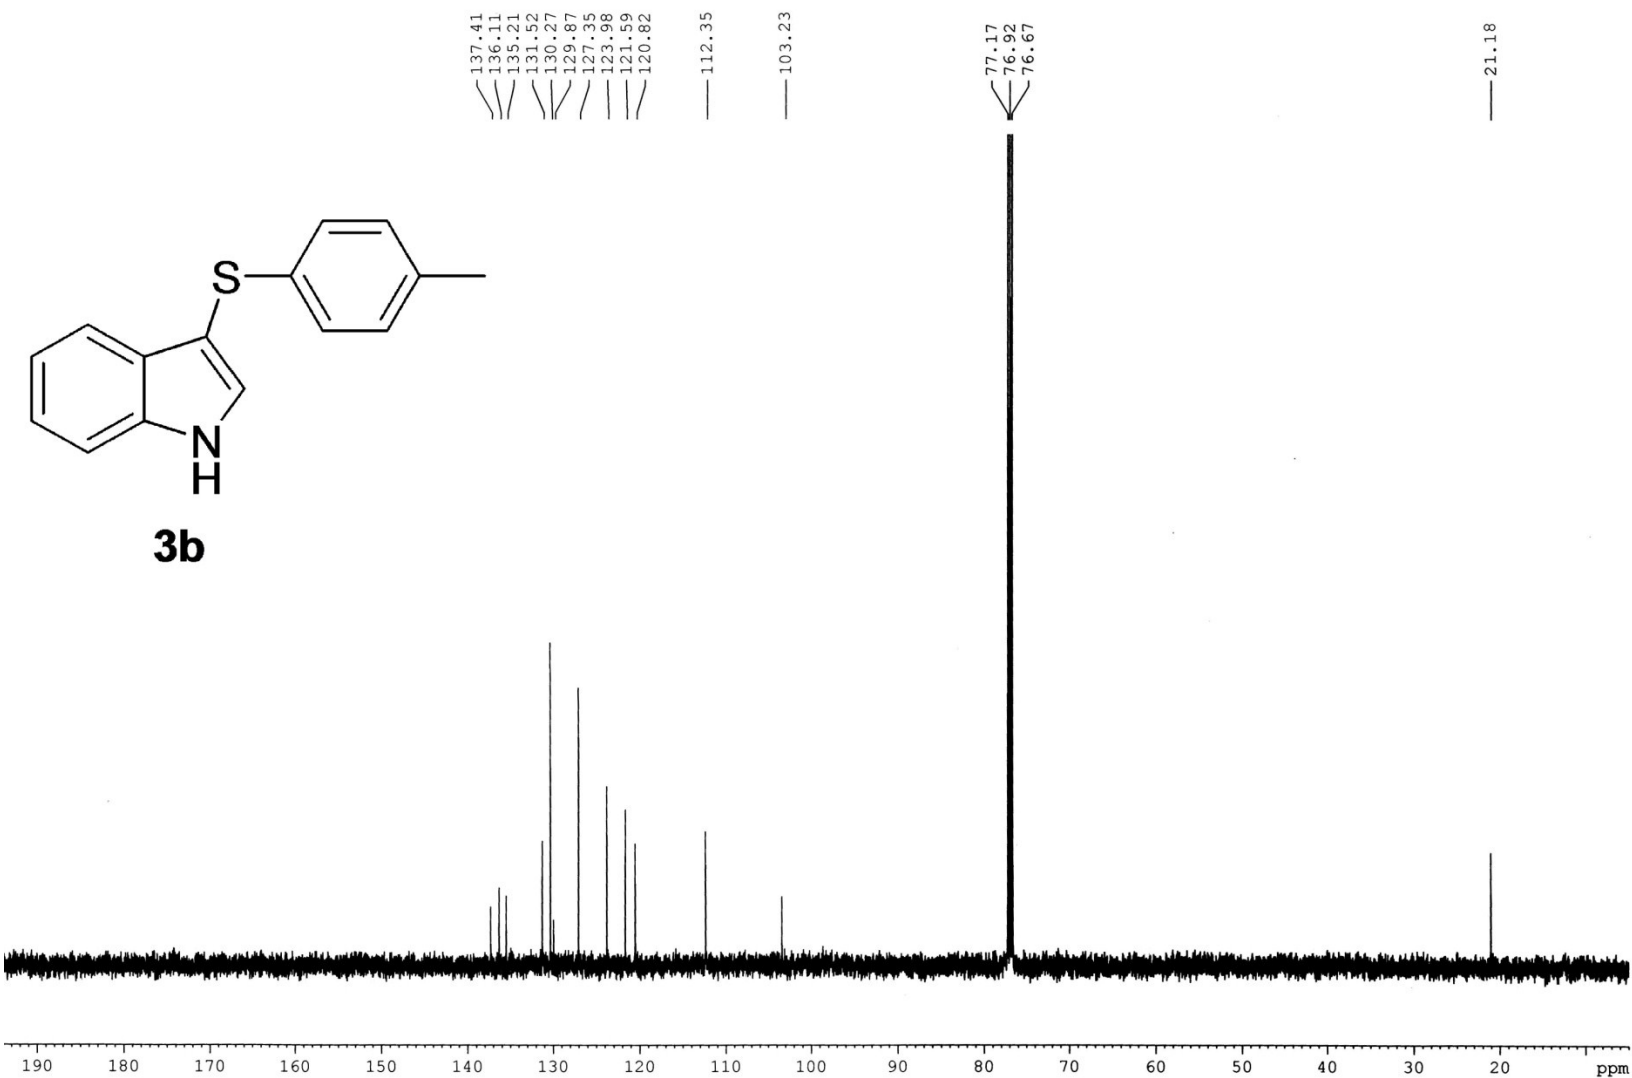



<sup>1</sup>H NMR of compound **3c** (CDCl<sub>3</sub>, 600 MHz)

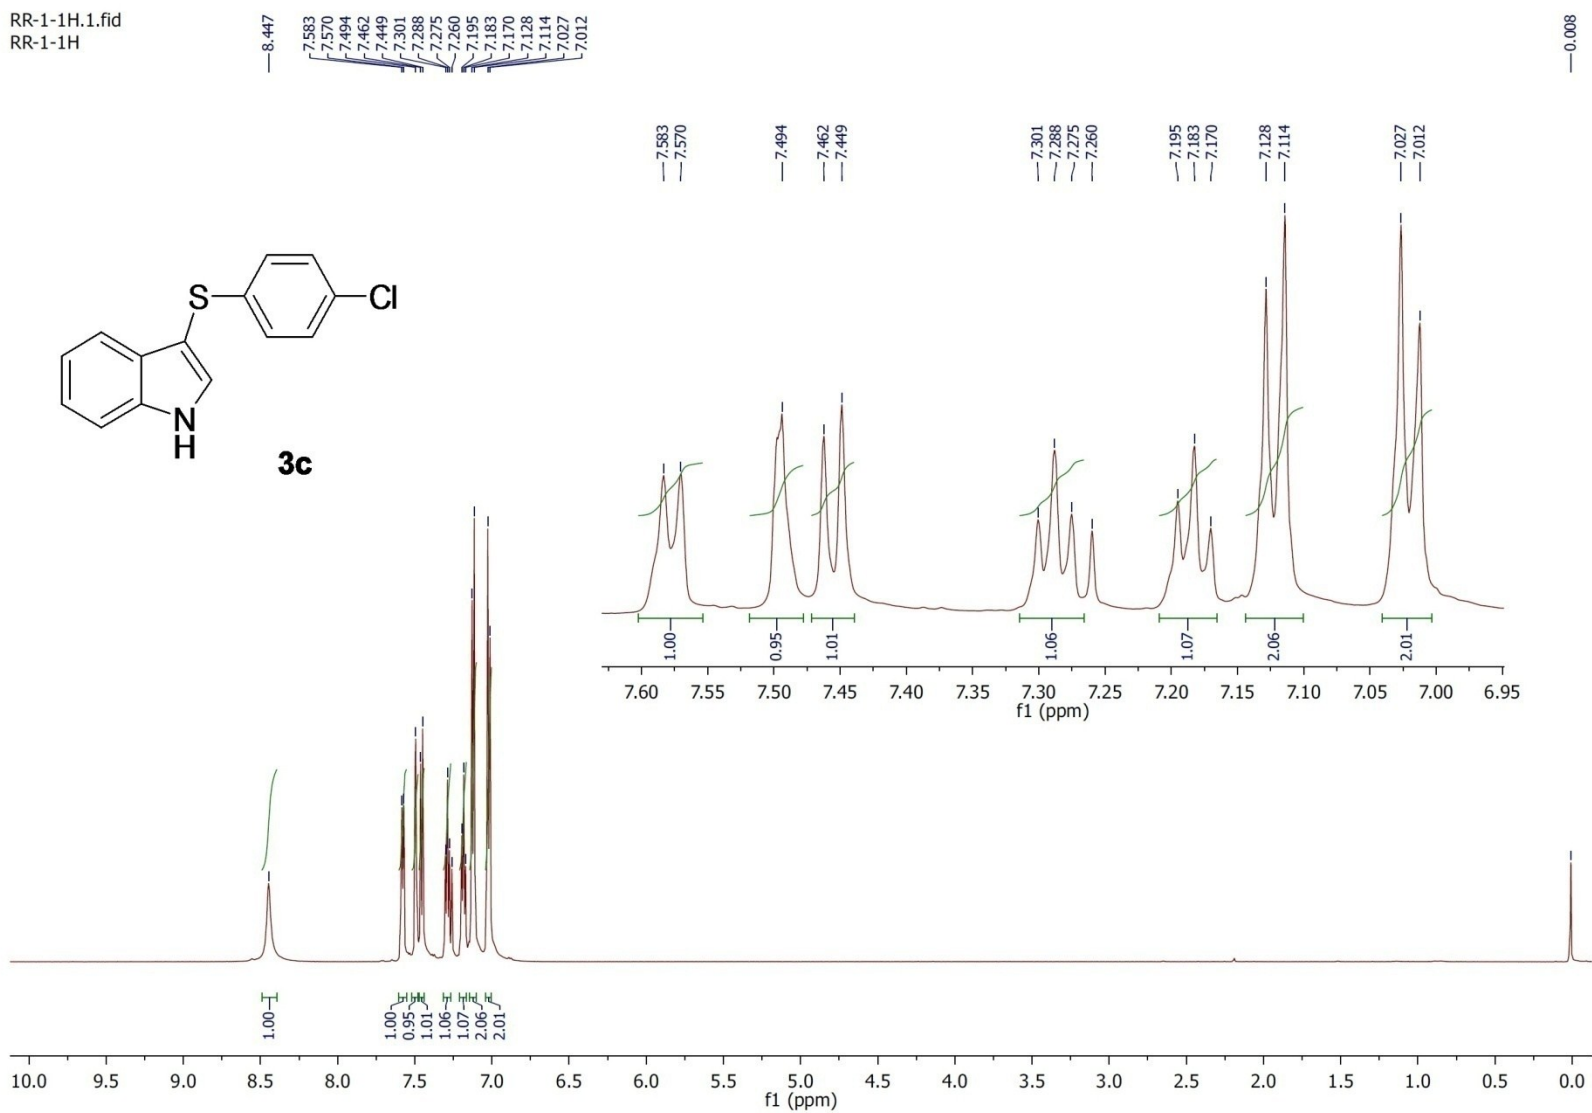

$^{13}\text{C}$  NMR of compound **3c** ( $\text{CDCl}_3$ , 150 MHz)

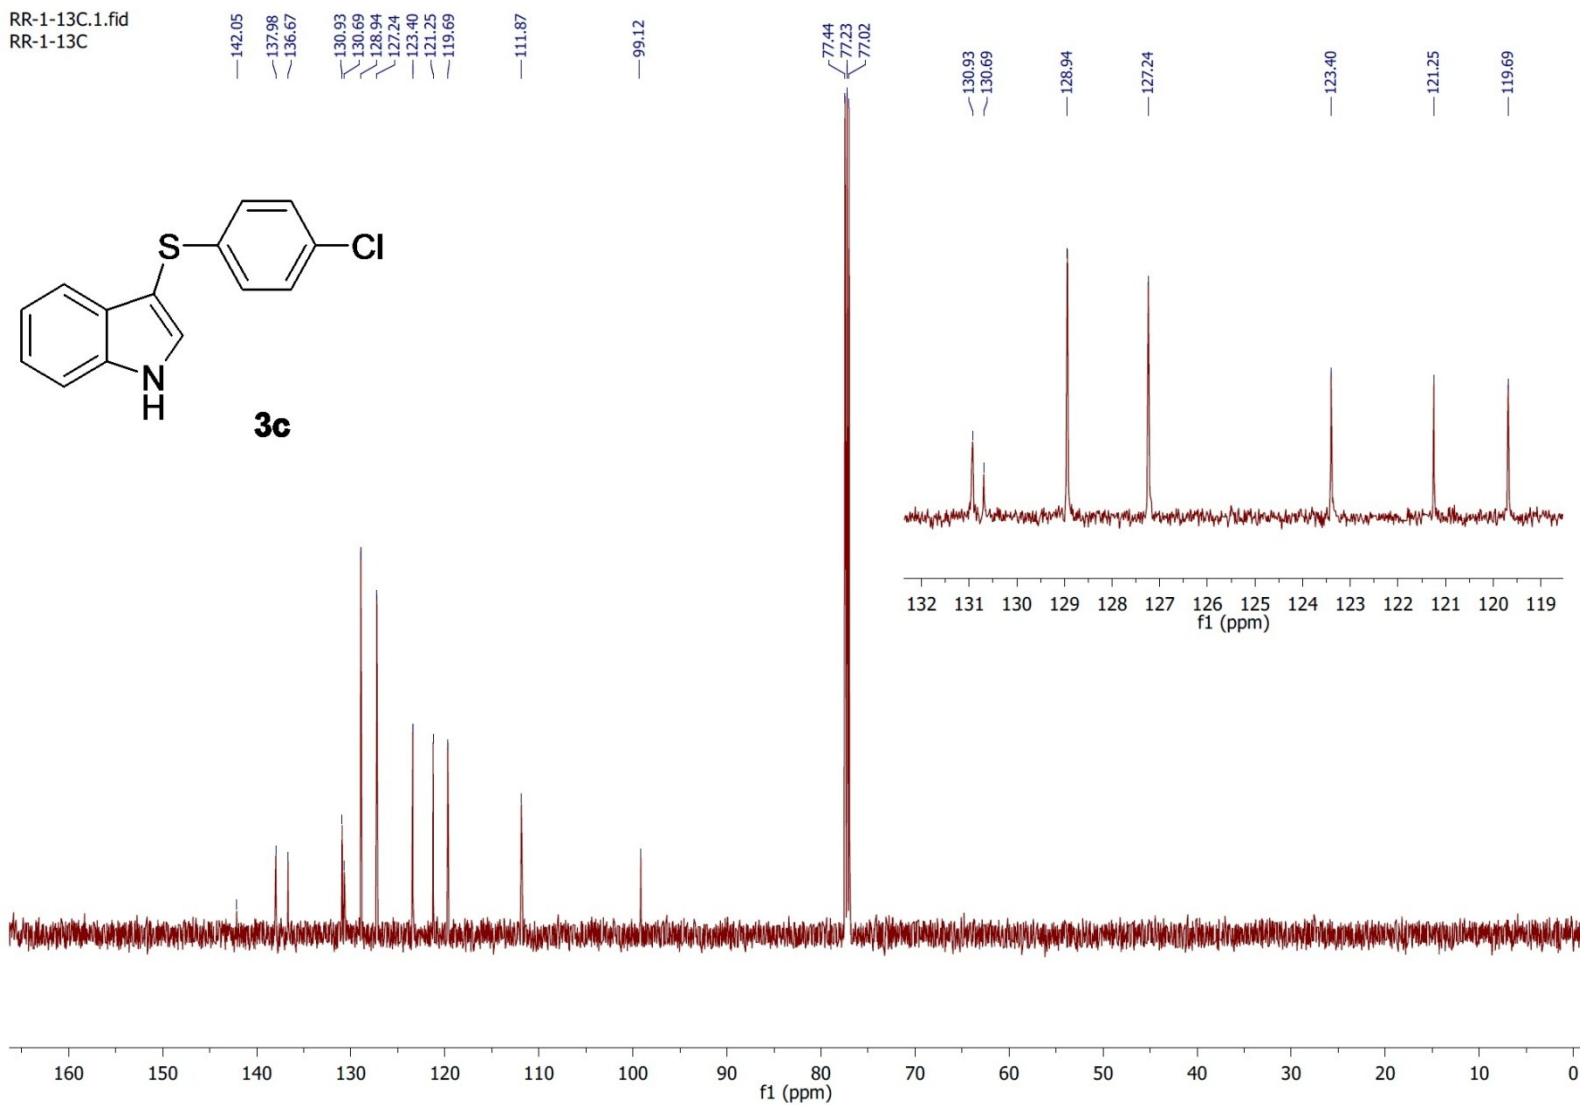

$^1\text{H}$  NMR of compound **3d** ( $\text{CDCl}_3$ , 600 MHz)

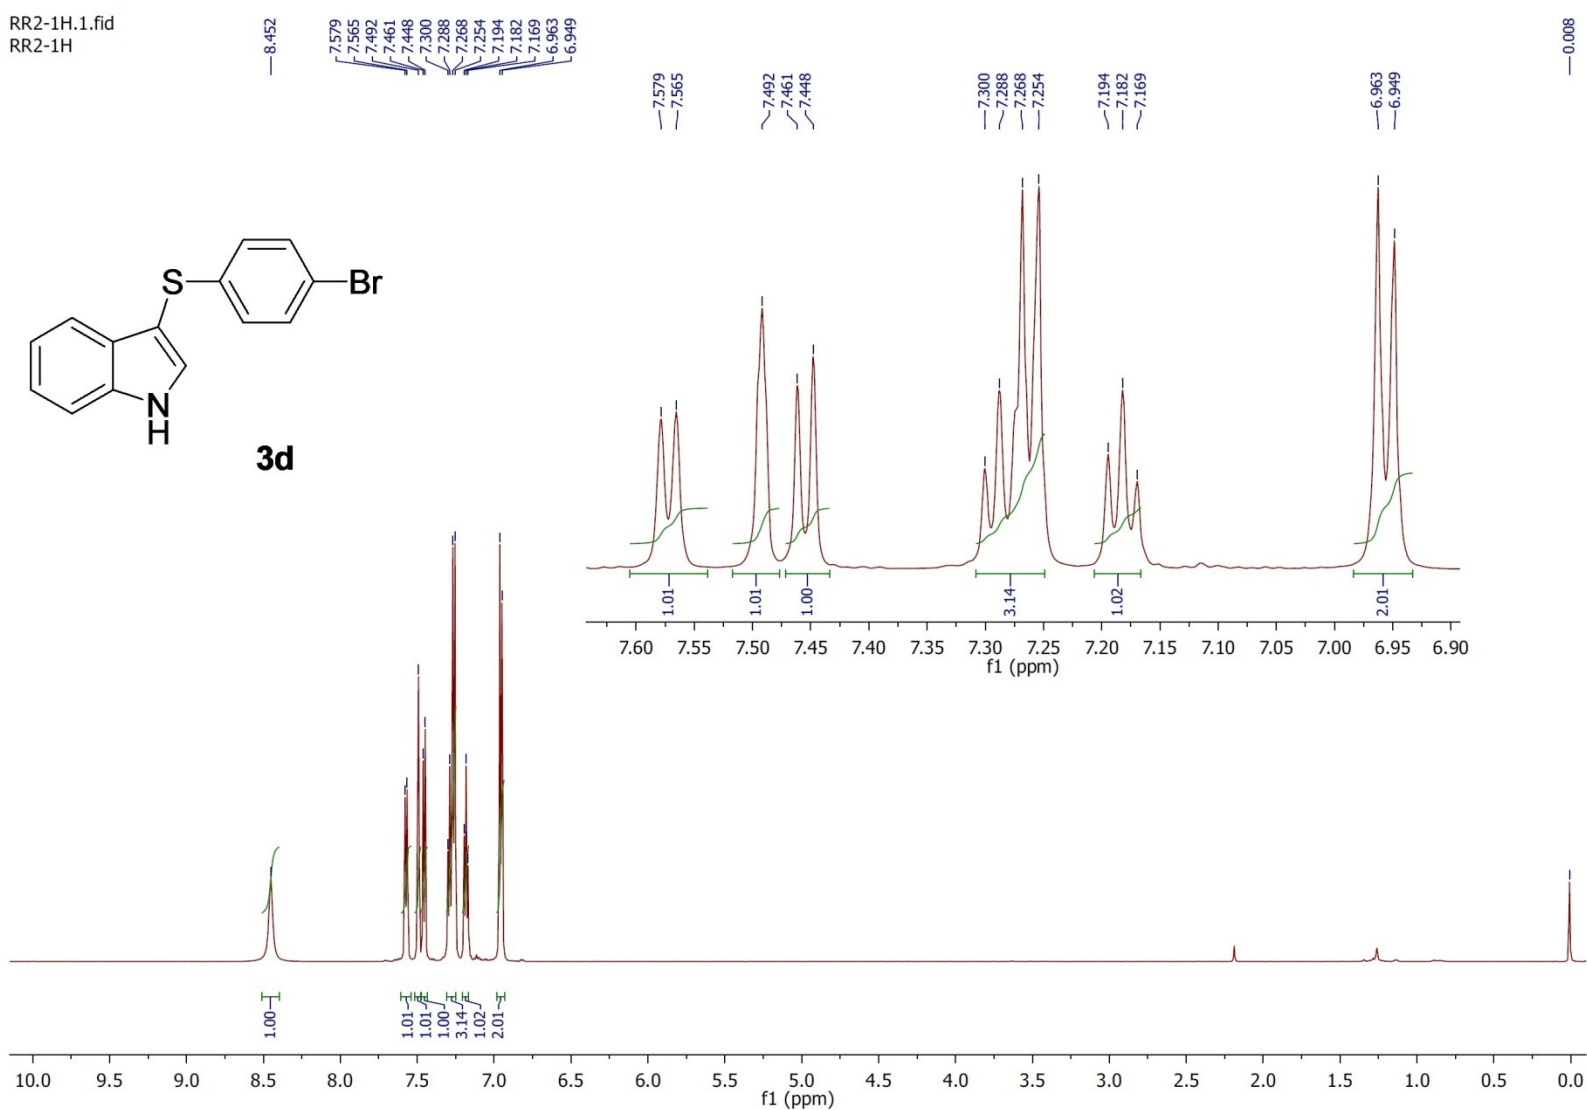

$^{13}\text{C}$  NMR of compound **3d** ( $\text{CDCl}_3$ , 125 MHz)

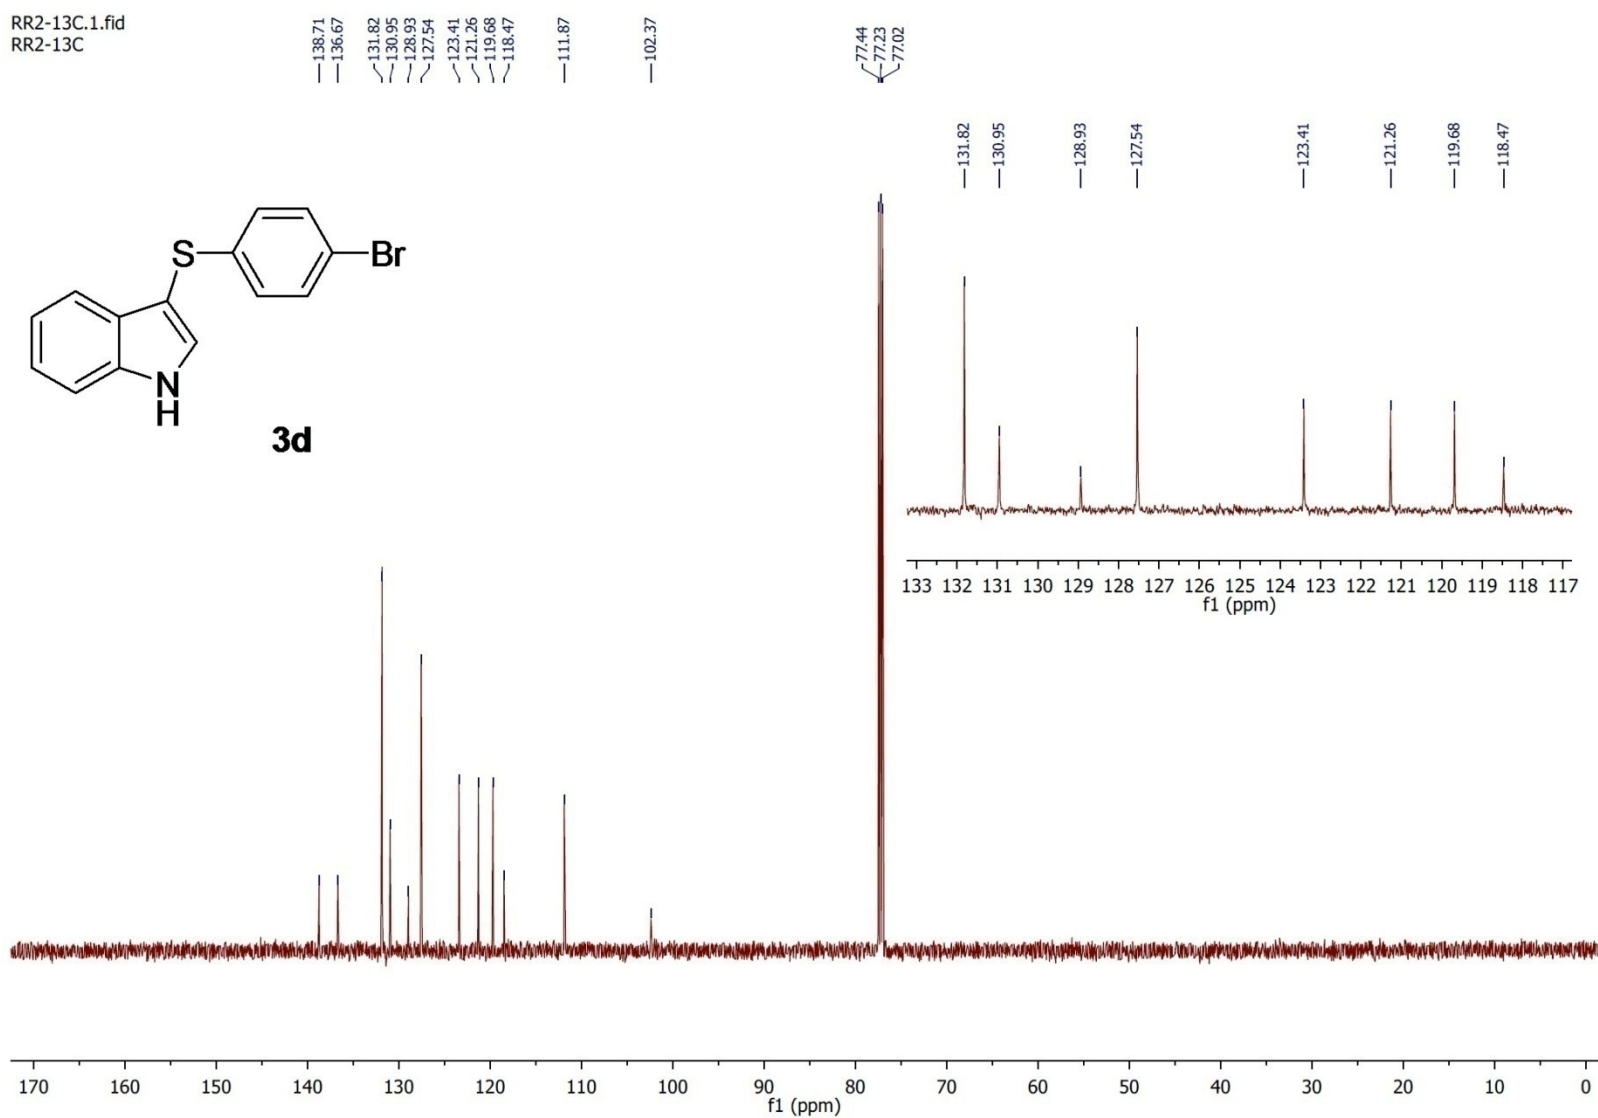



$^1\text{H}$  NMR of compound **3e** ( $\text{CDCl}_3$ , 400 MHz)

proton.14.fid  
rl-3

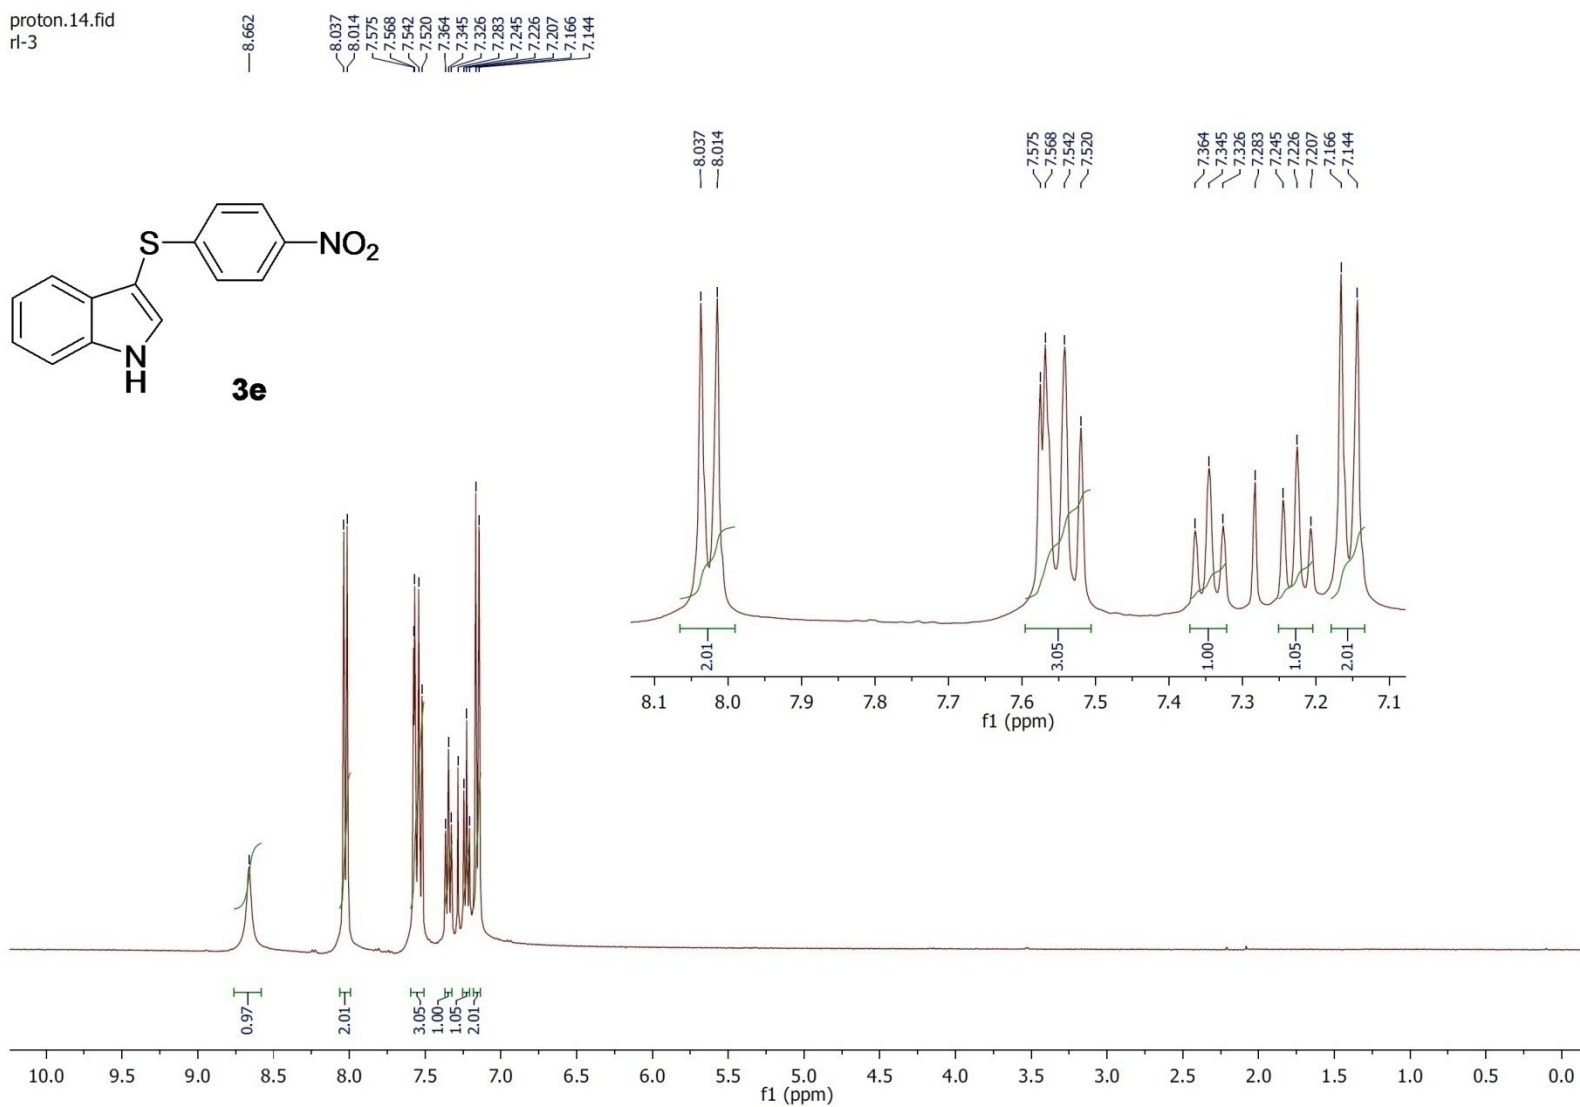

$^{13}\text{C}$  NMR of compound **3e** ( $\text{CDCl}_3$ , 100 MHz)

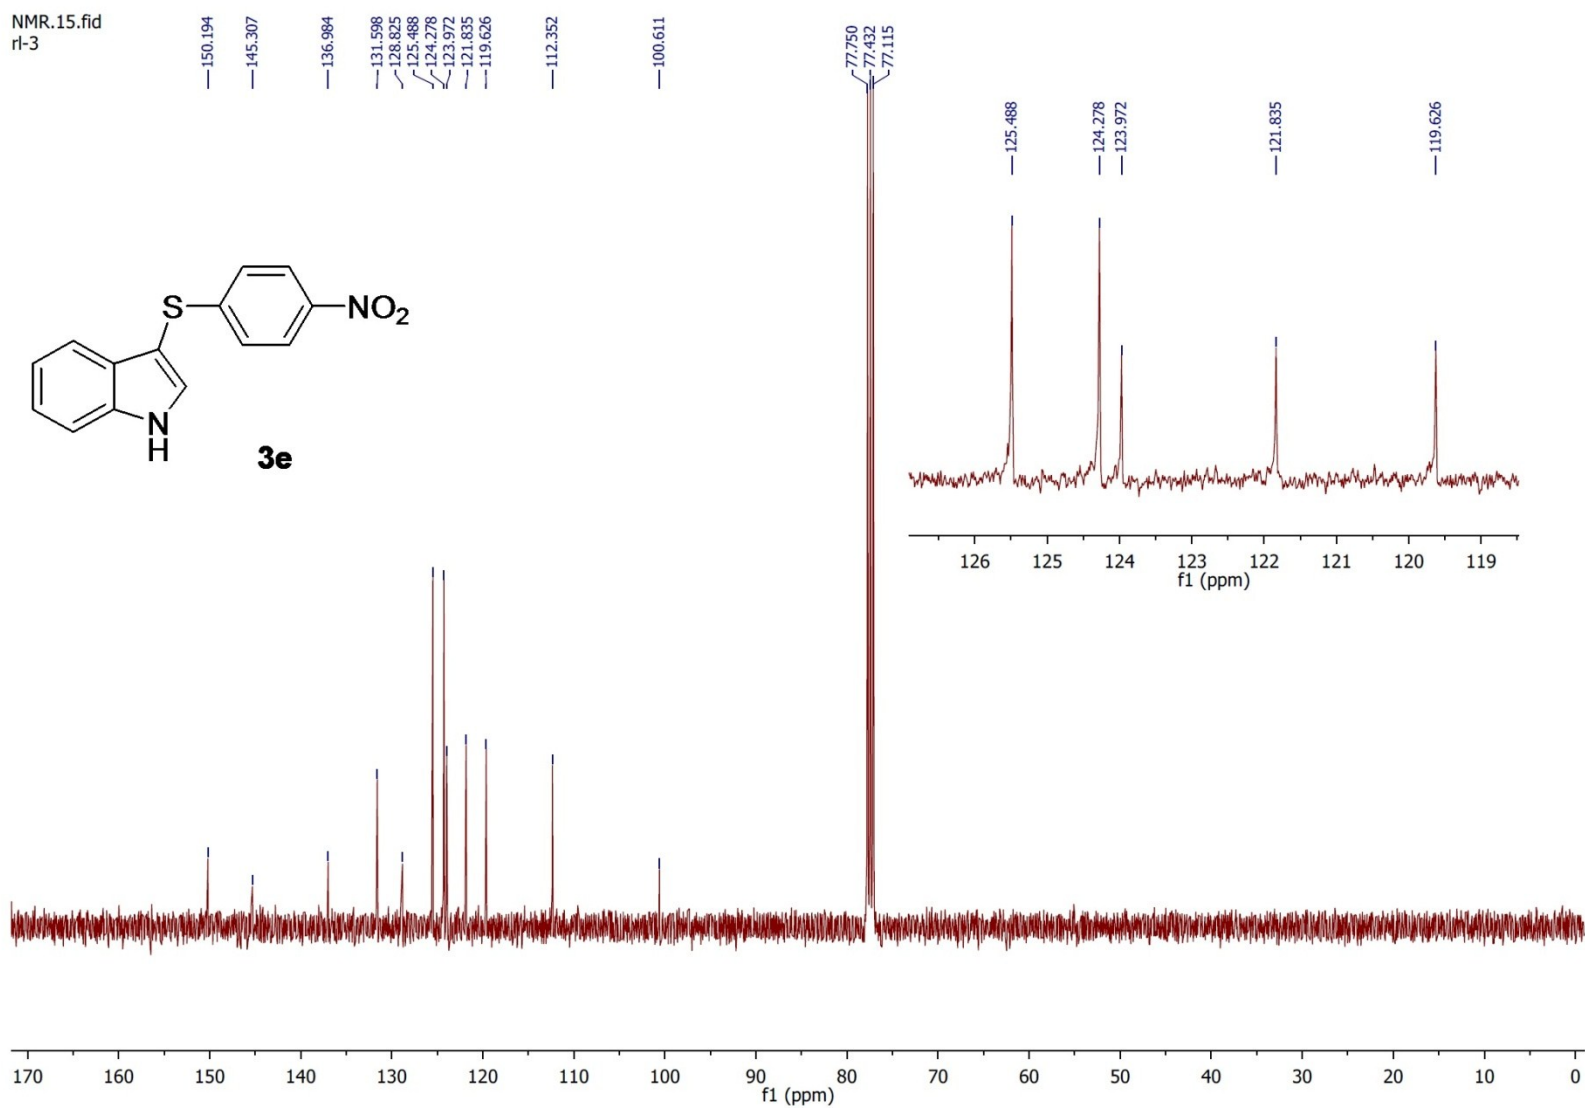

$^1\text{H}$  NMR of compound **3f** ( $\text{CDCl}_3$ , 400 MHz)

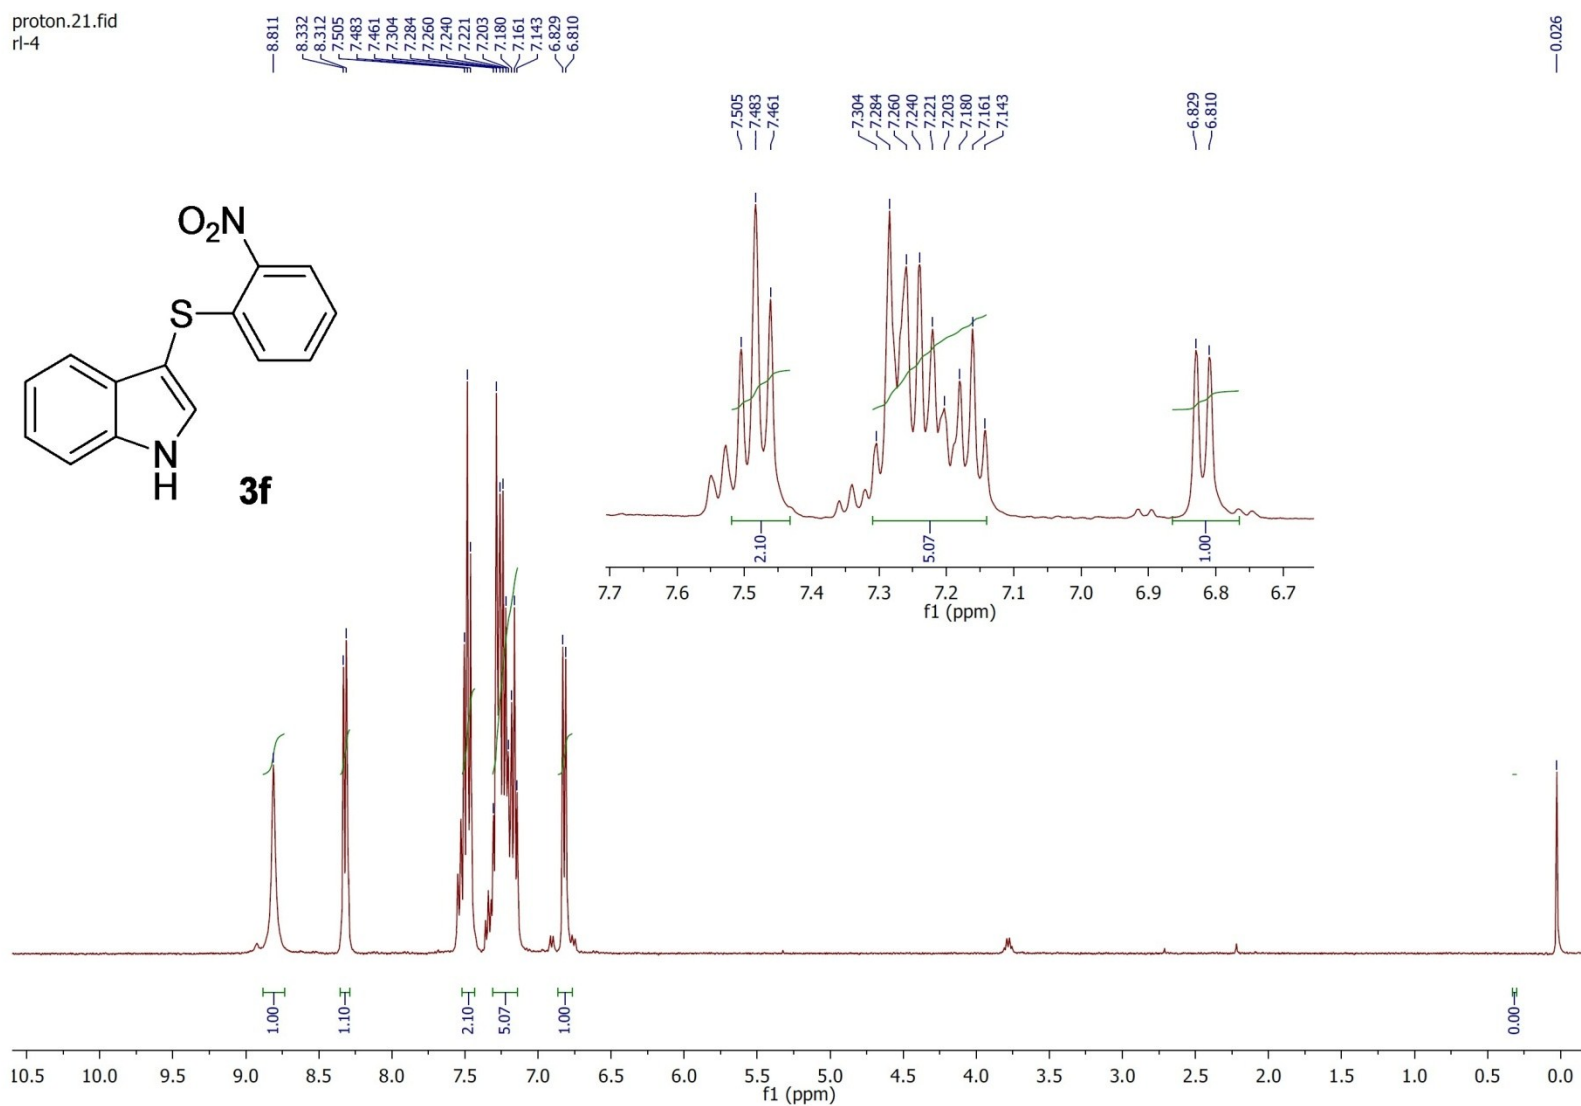

$^{13}\text{C}$  NMR of compound **3f** ( $\text{CDCl}_3$ , 100 MHz)

NMR.22.fid  
rl-4

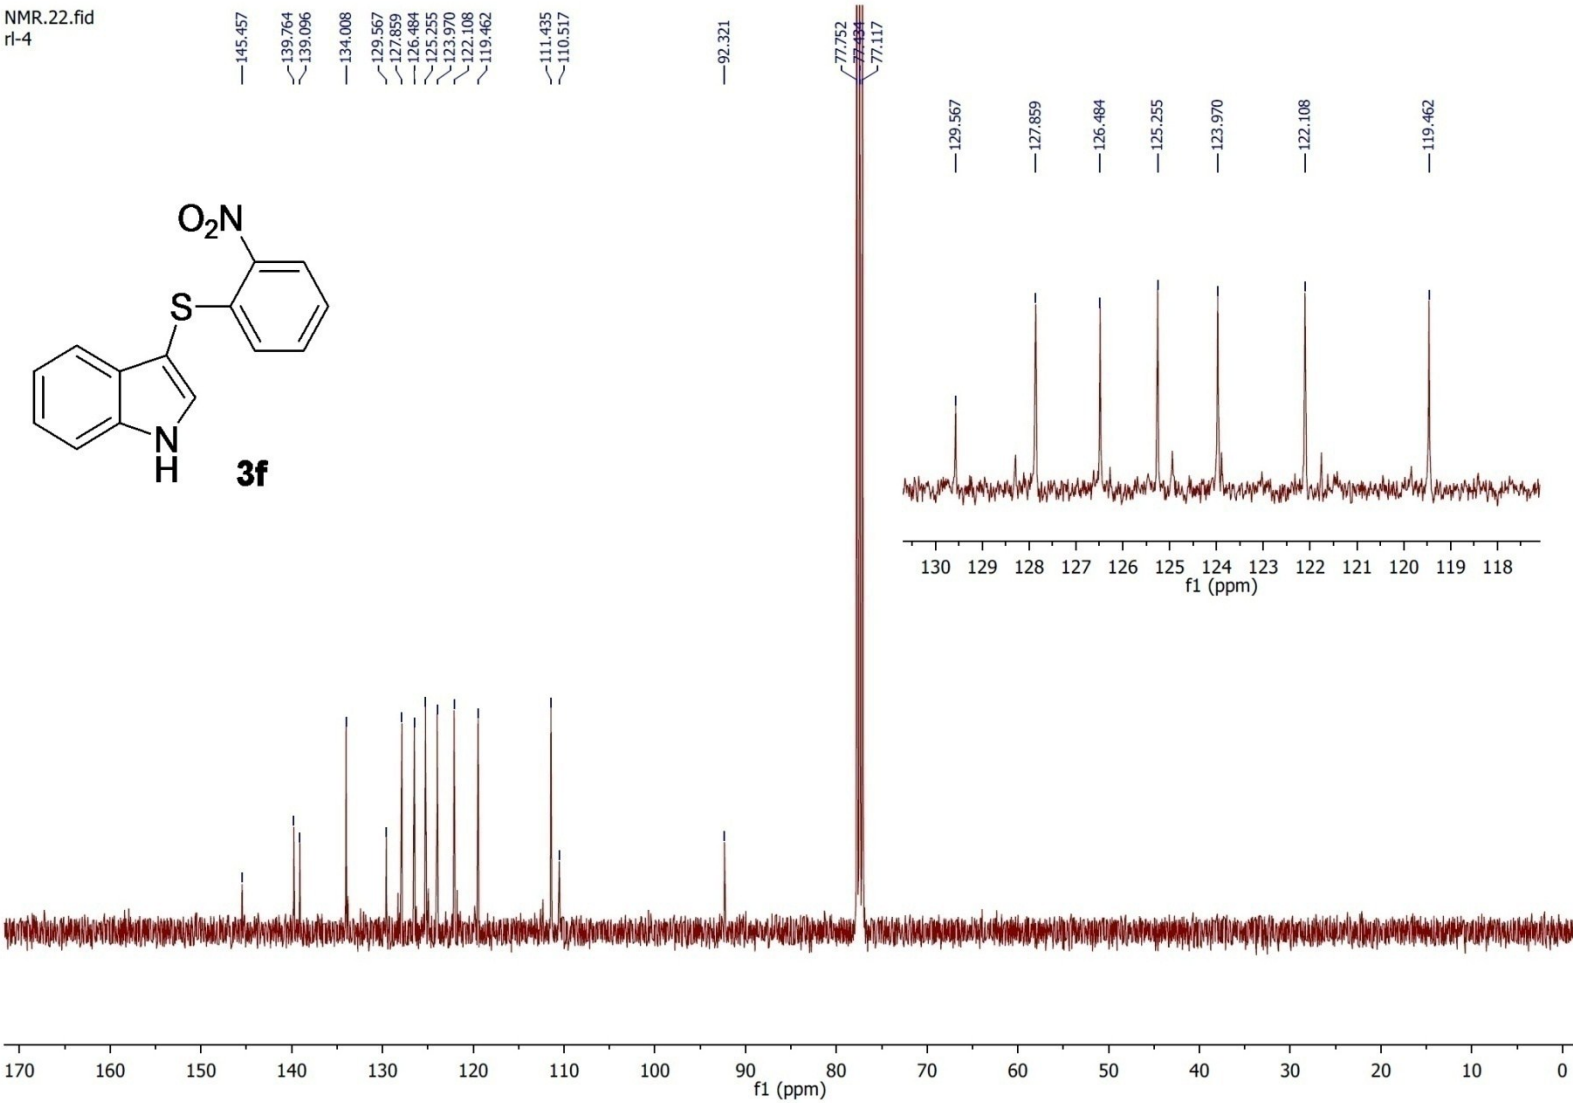



$^1\text{H}$  NMR of compound **3g** ( $\text{CDCl}_3$ , 400 MHz)

proton.28.fid  
rl-2

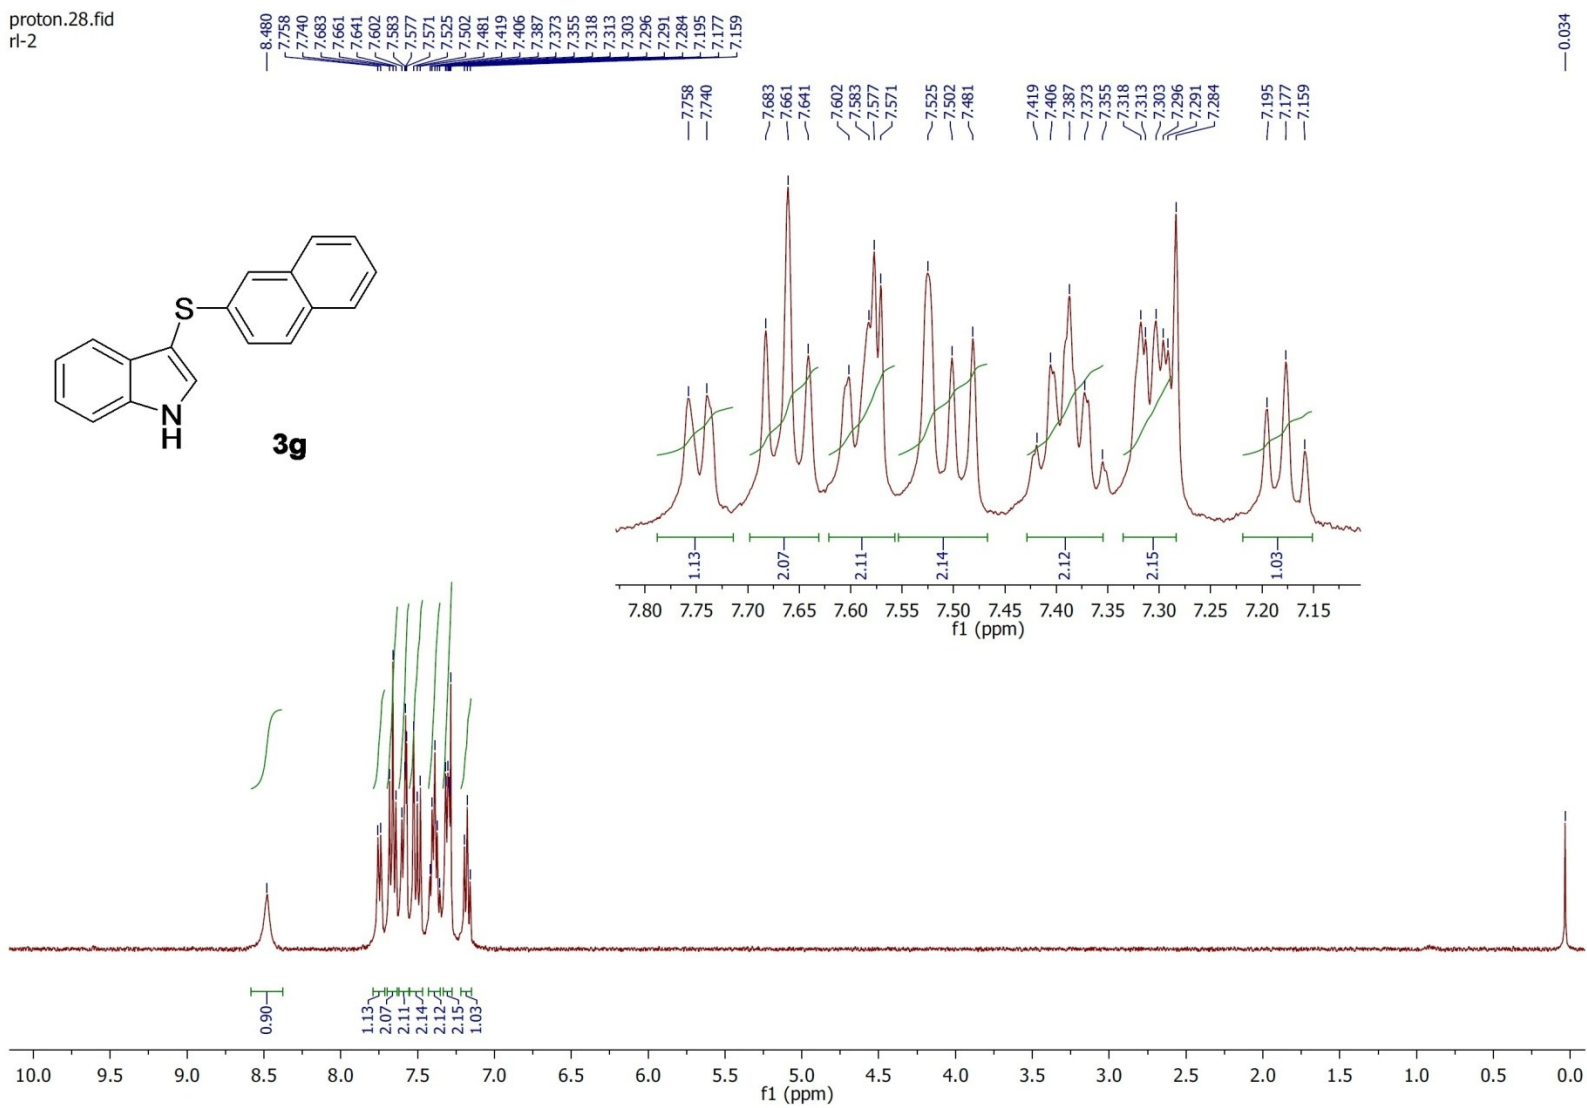

$^{13}\text{C}$  NMR of compound **3g** ( $\text{CDCl}_3$ , 100 MHz)

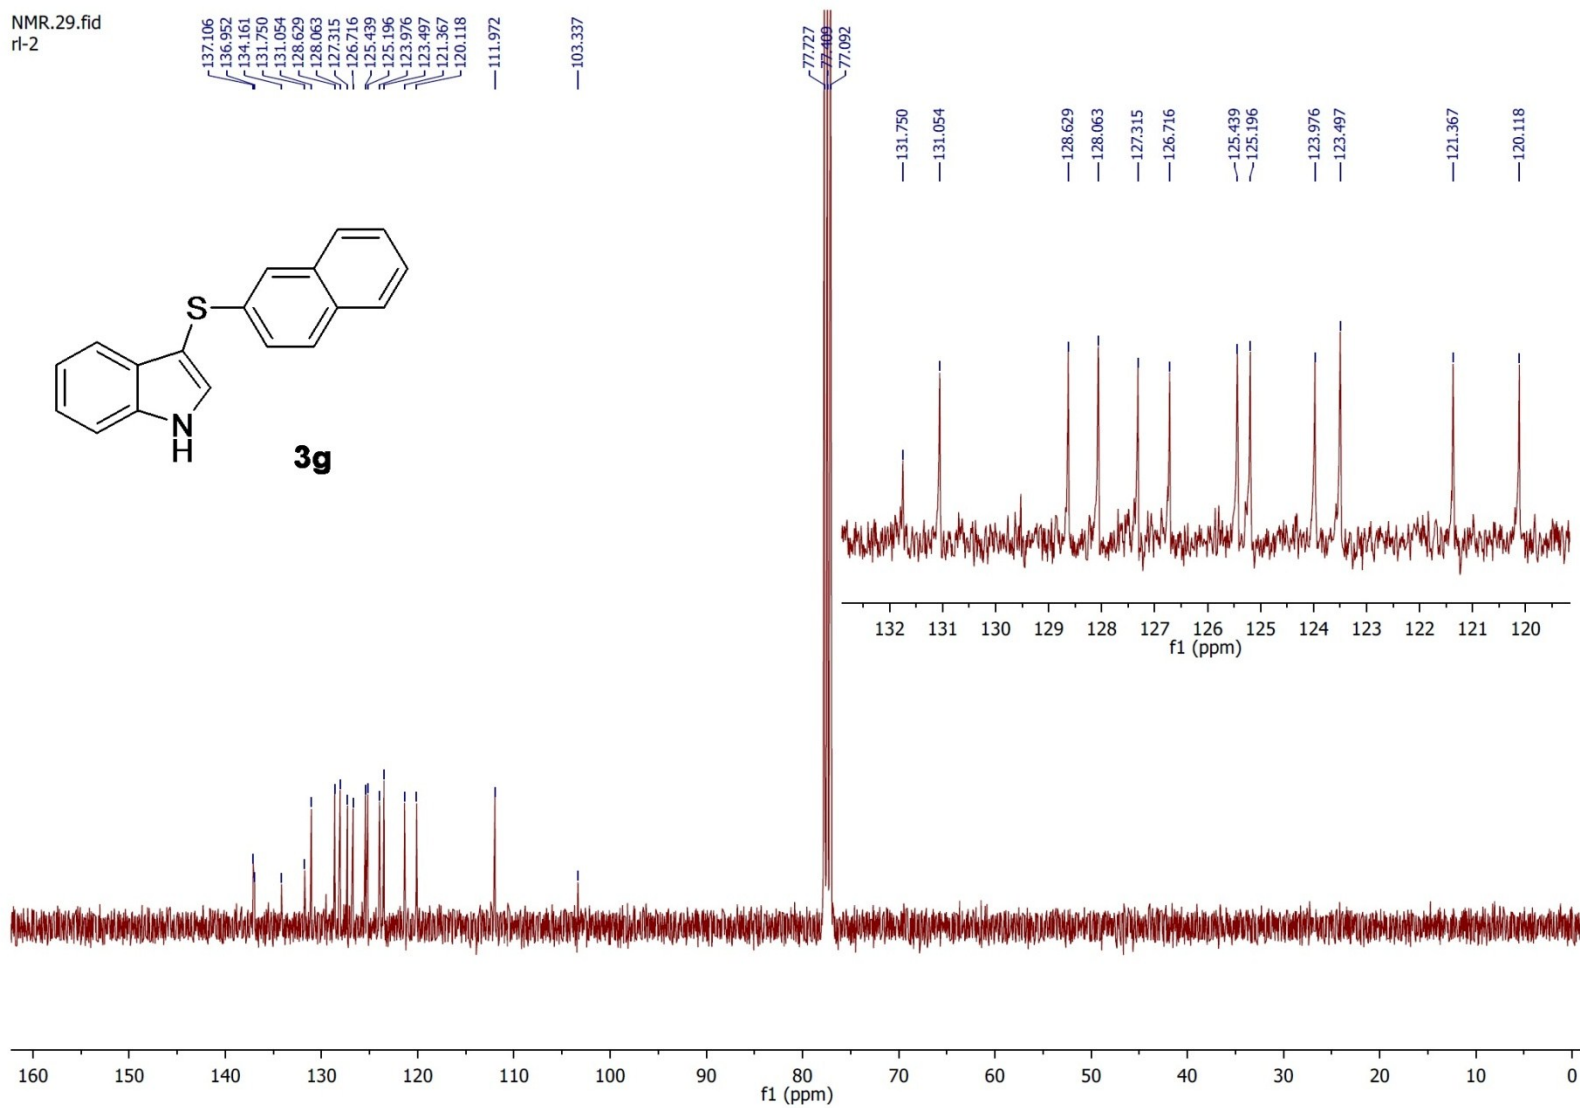

<sup>1</sup>H NMR of compound **3h** (CDCl<sub>3</sub>, 400 MHz)

6824.1.fid  
Name of Sample:K-5  
Spectrum No :6824

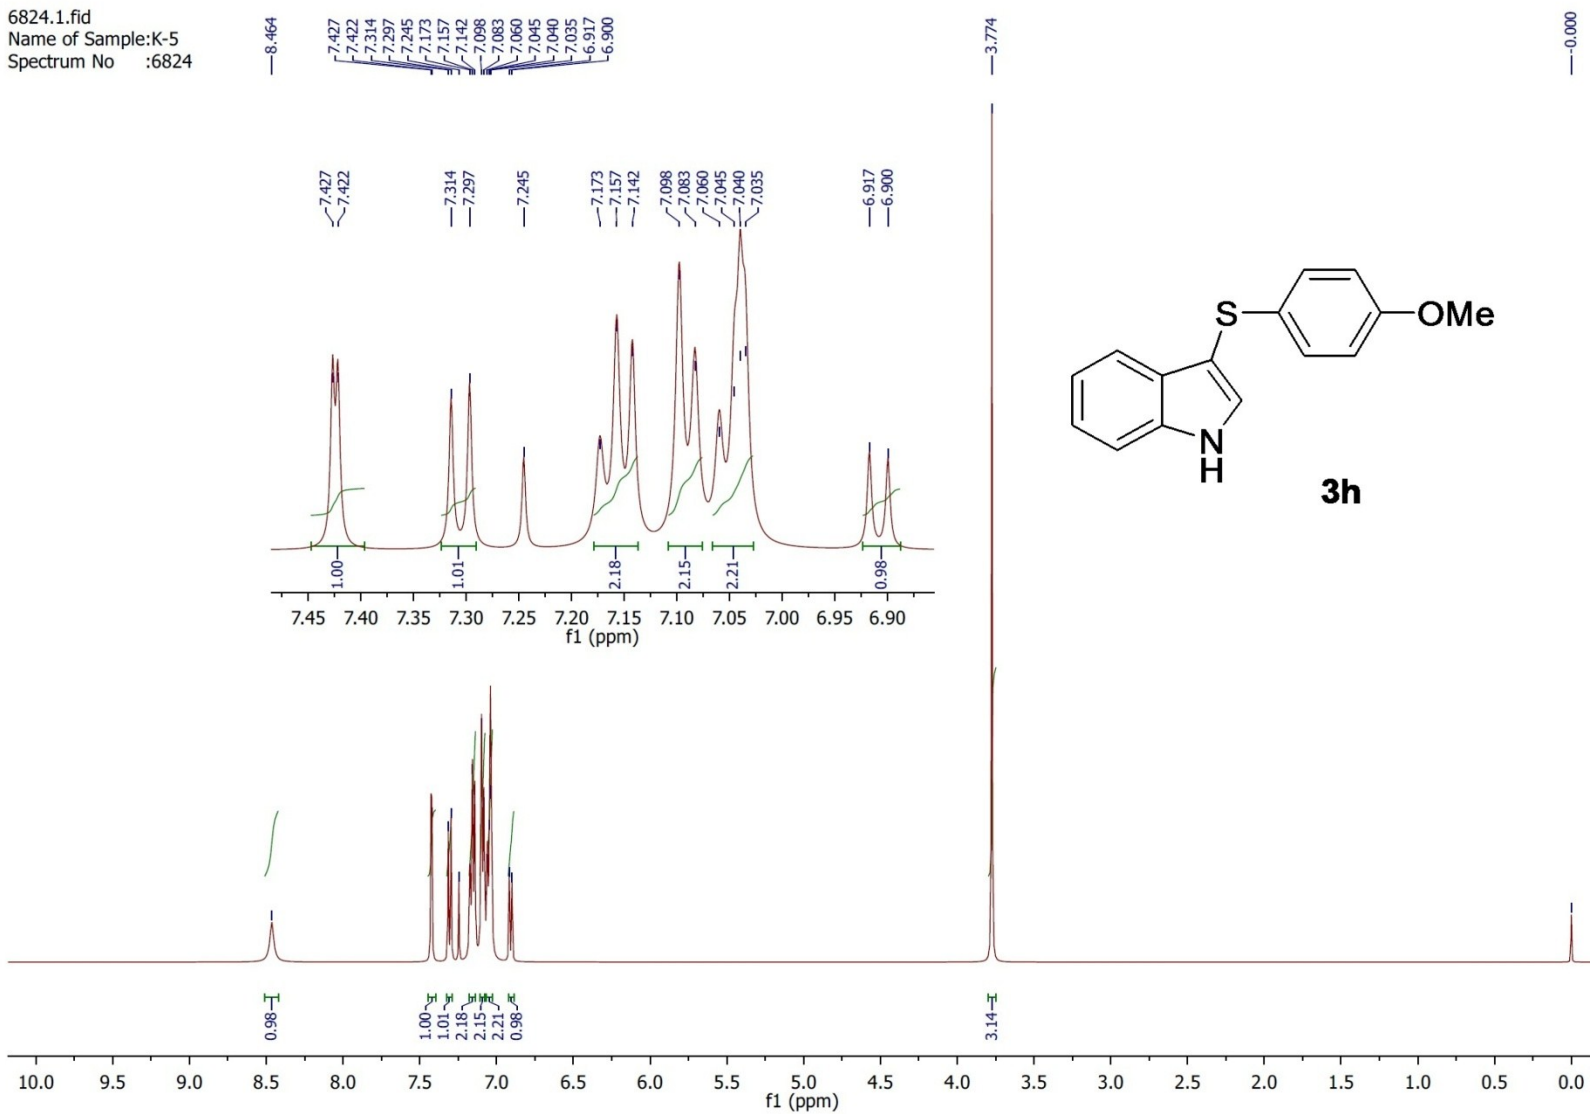

<sup>1</sup>H NMR of compound **3m** (CDCl<sub>3</sub>, 600 MHz)

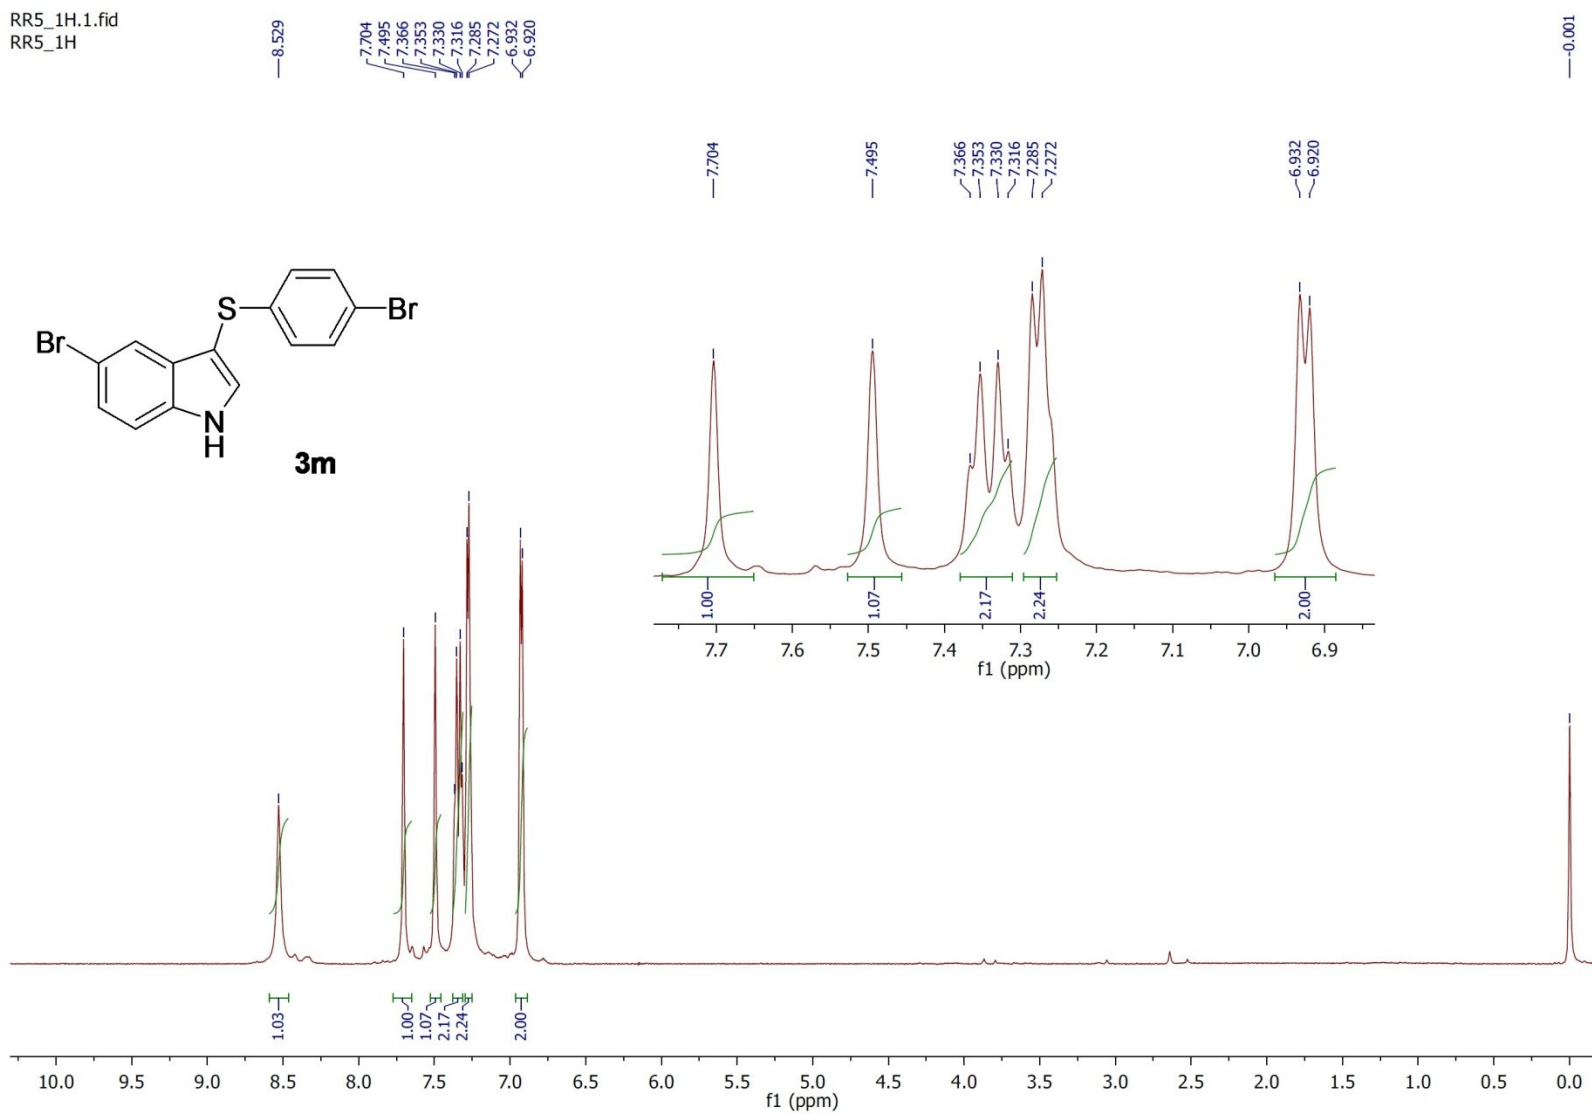



<sup>1</sup>H NMR of compound **3n** (DMSO-d<sub>6</sub>, 400 MHz)

6591.1.fid

Name of Sample:K-3

Spectrum No :6591

—8.567

7.701  
7.467  
7.461  
7.352  
7.335  
7.302  
7.284  
7.246  
7.132  
7.115  
6.992  
6.974

—0.000

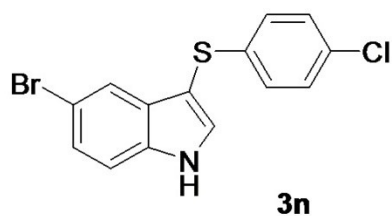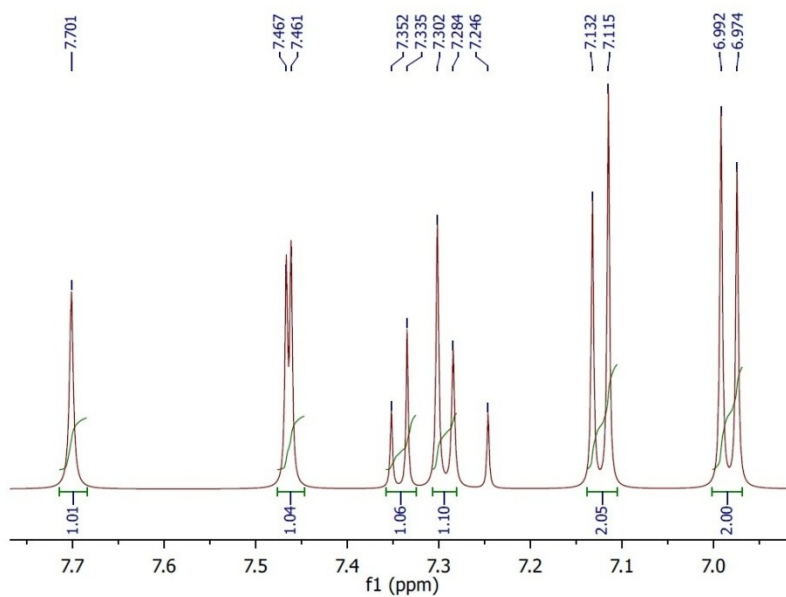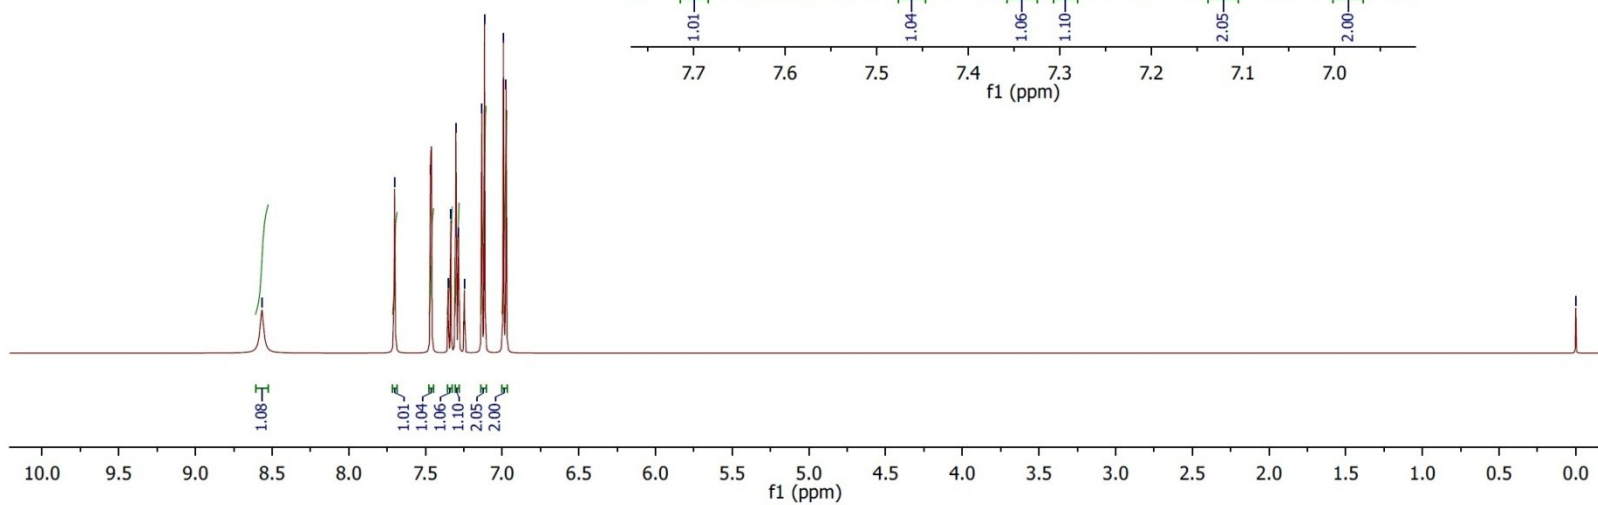

$^1\text{H}$  NMR of compound **3o** ( $\text{CDCl}_3$ , 400 MHz)

NMR IN.27.fid  
IN-10

— 8.527  
7.738  
7.514  
7.397  
7.375  
7.350  
7.329  
7.285  
7.174  
7.153  
7.029  
7.009

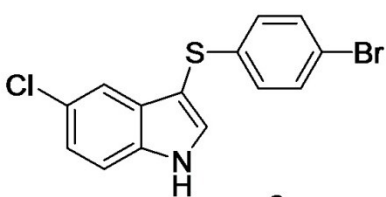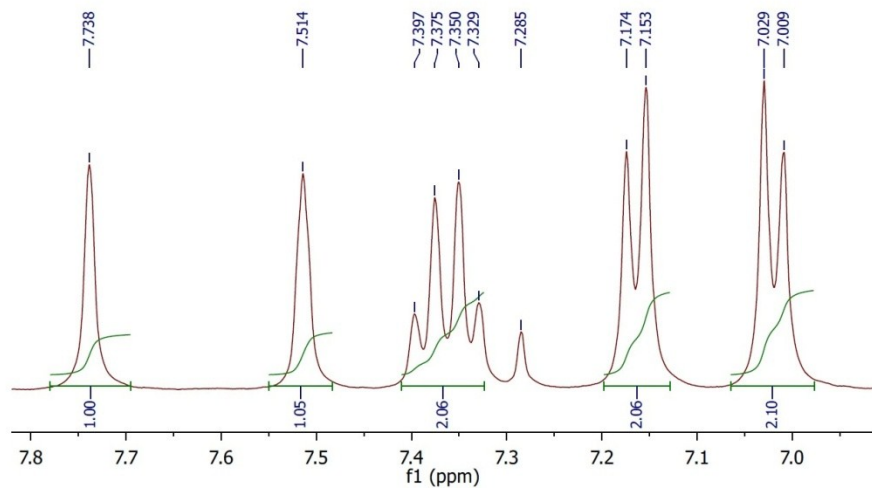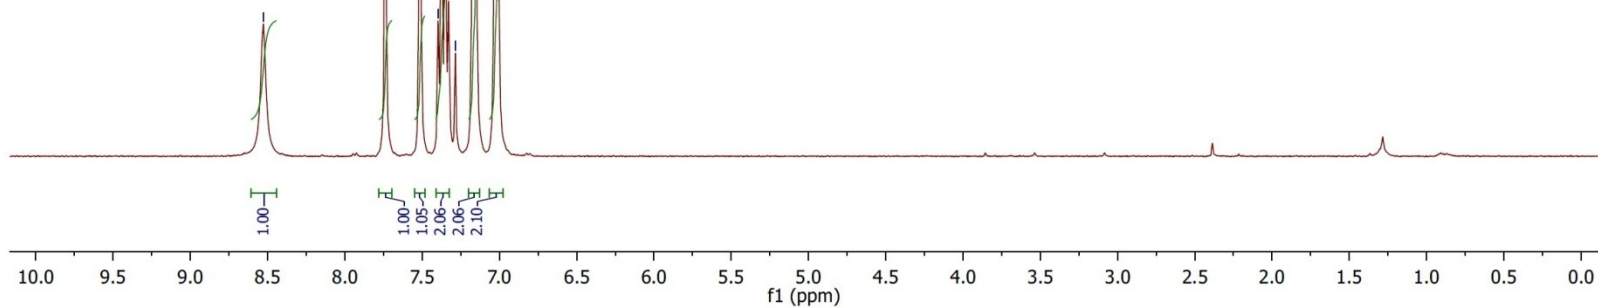

$^1\text{H}$  NMR of compound **3p** ( $\text{CDCl}_3$ , 400 MHz)

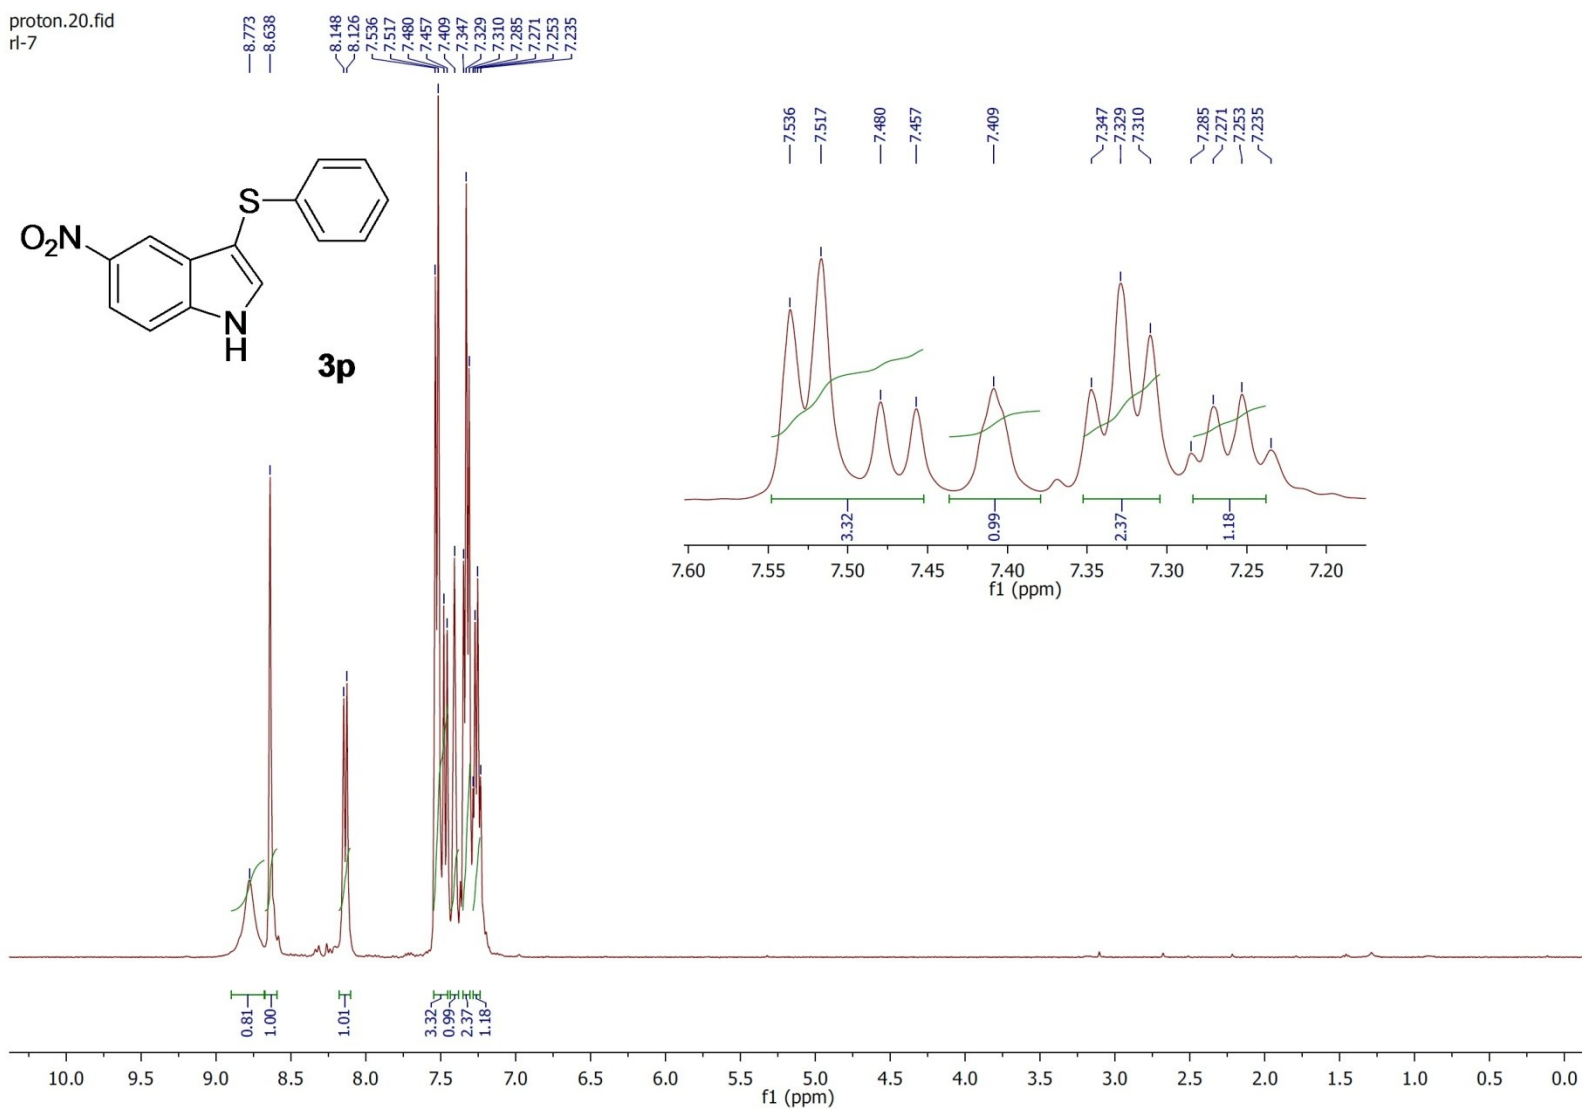

$^1\text{H}$  NMR of compound **3q** ( $\text{CDCl}_3$ , 400 MHz)

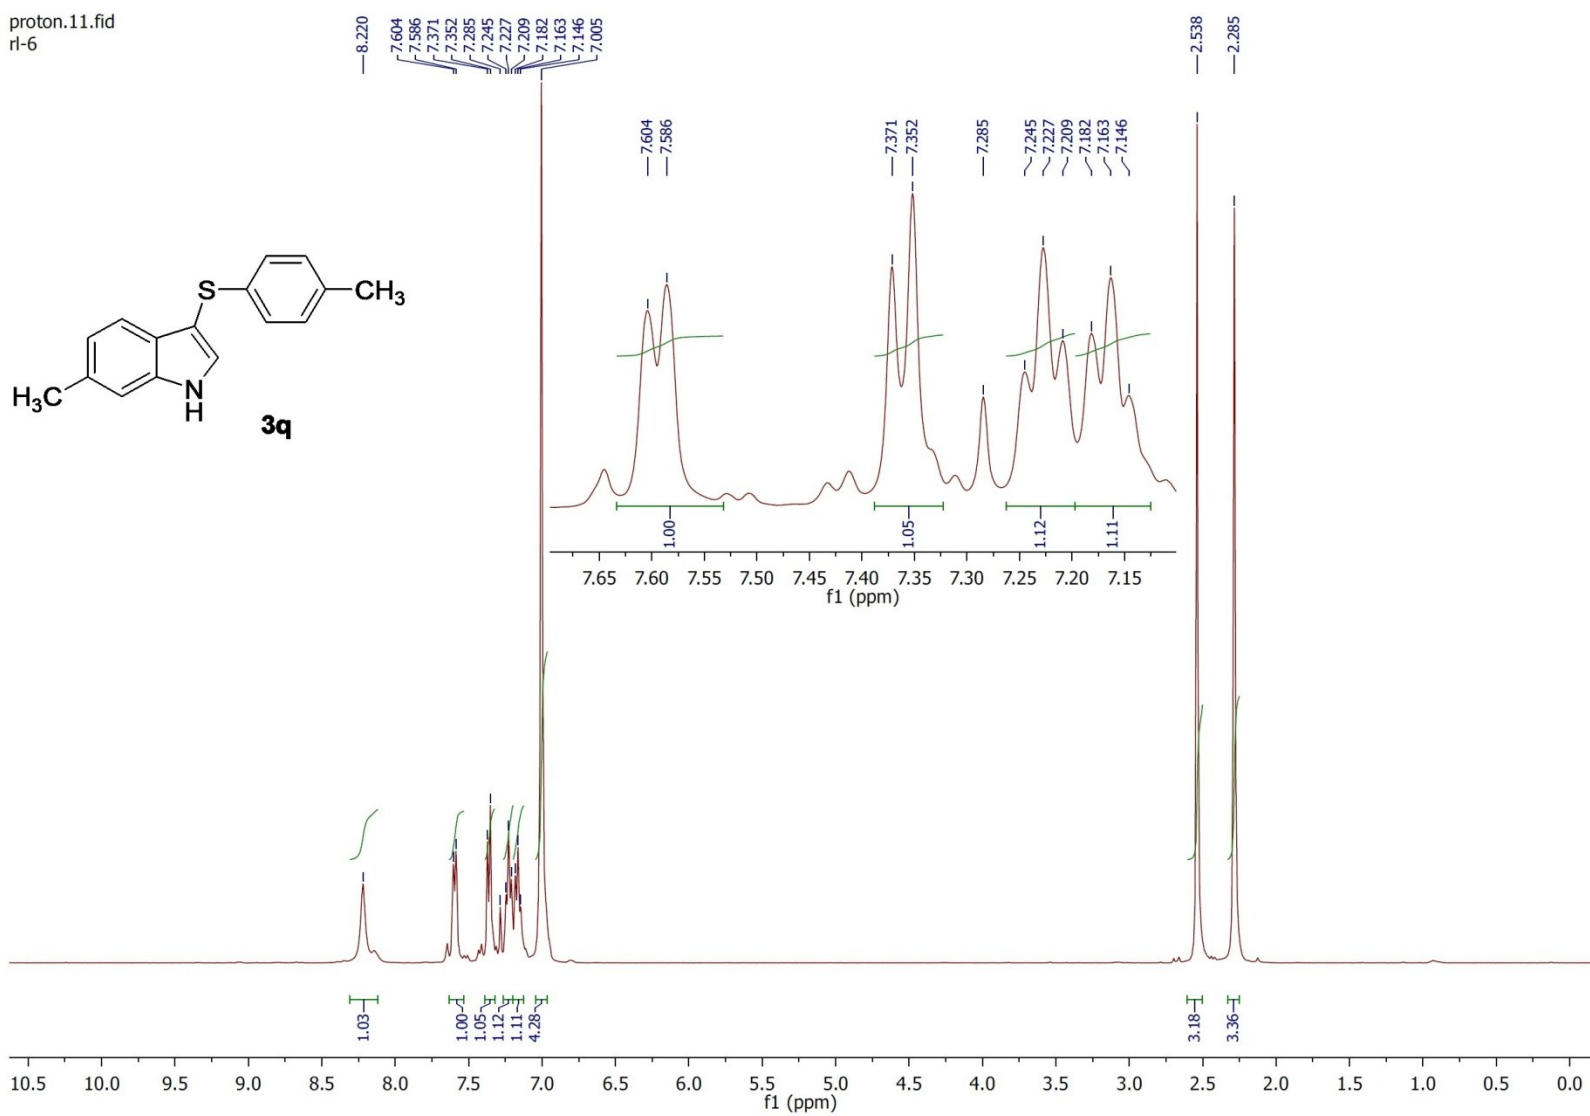



<sup>1</sup>H NMR of compound **3r** (CDCl<sub>3</sub>, 400 MHz)

6823.1.fid  
Name of Sample:K-4  
Spectrum No :6823

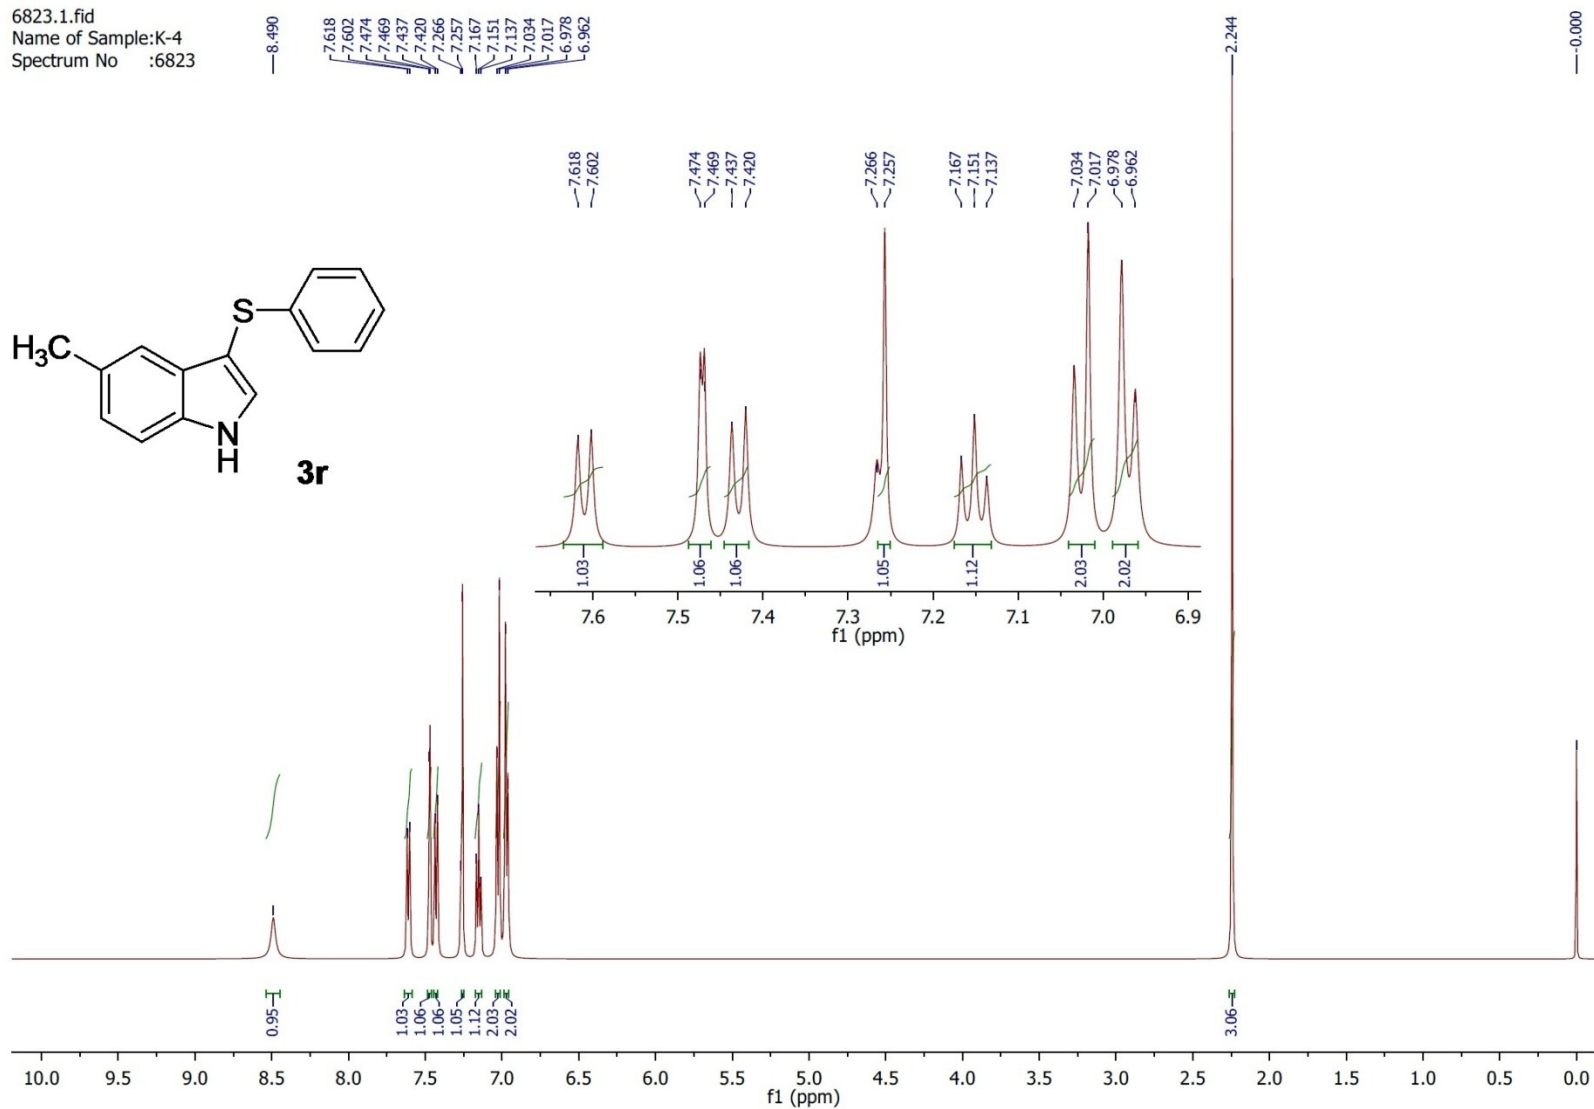

$^{13}\text{C}$  NMR of compound **3r** ( $\text{CDCl}_3$ , 125 MHz)

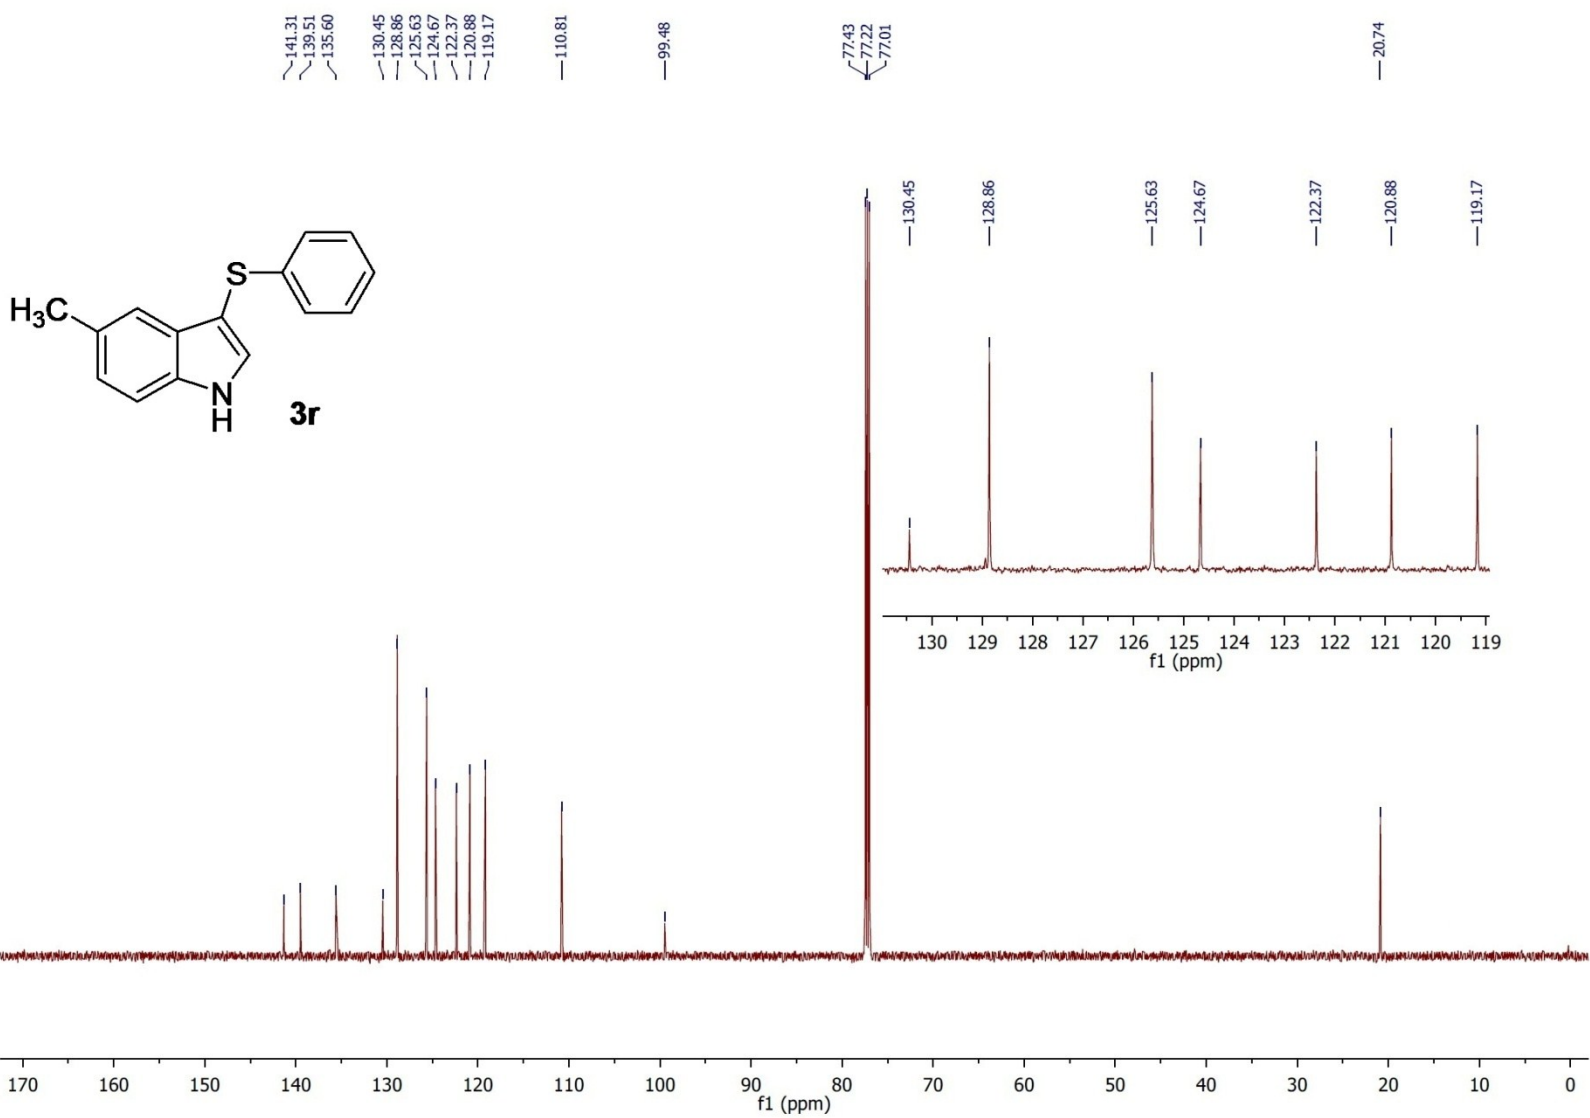

<sup>1</sup>H NMR of compound **4a** (DMSO-d<sub>6</sub>, 400 MHz)

6546.1.fid  
Name of Sample:K-1  
Spectrum No :6546

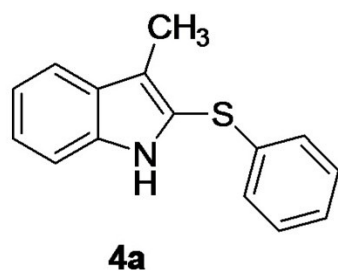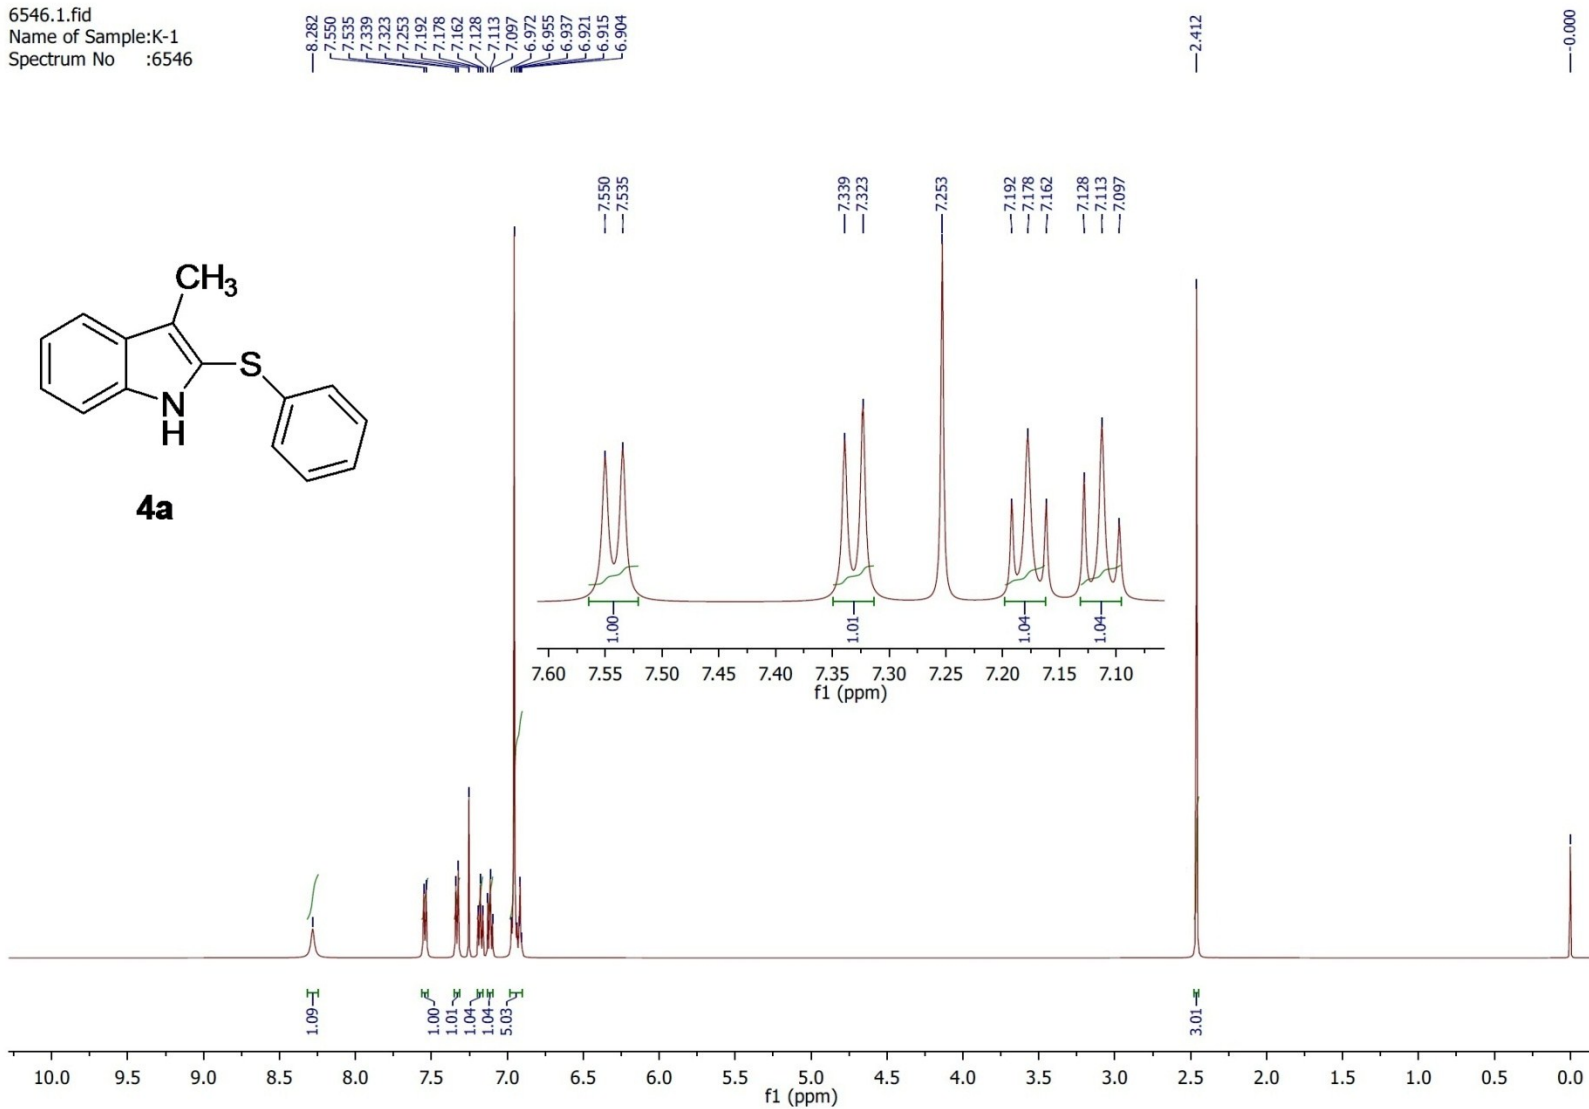

$^{13}\text{C}$  NMR of compound **4a** ( $\text{CDCl}_3$ , 100 MHz)

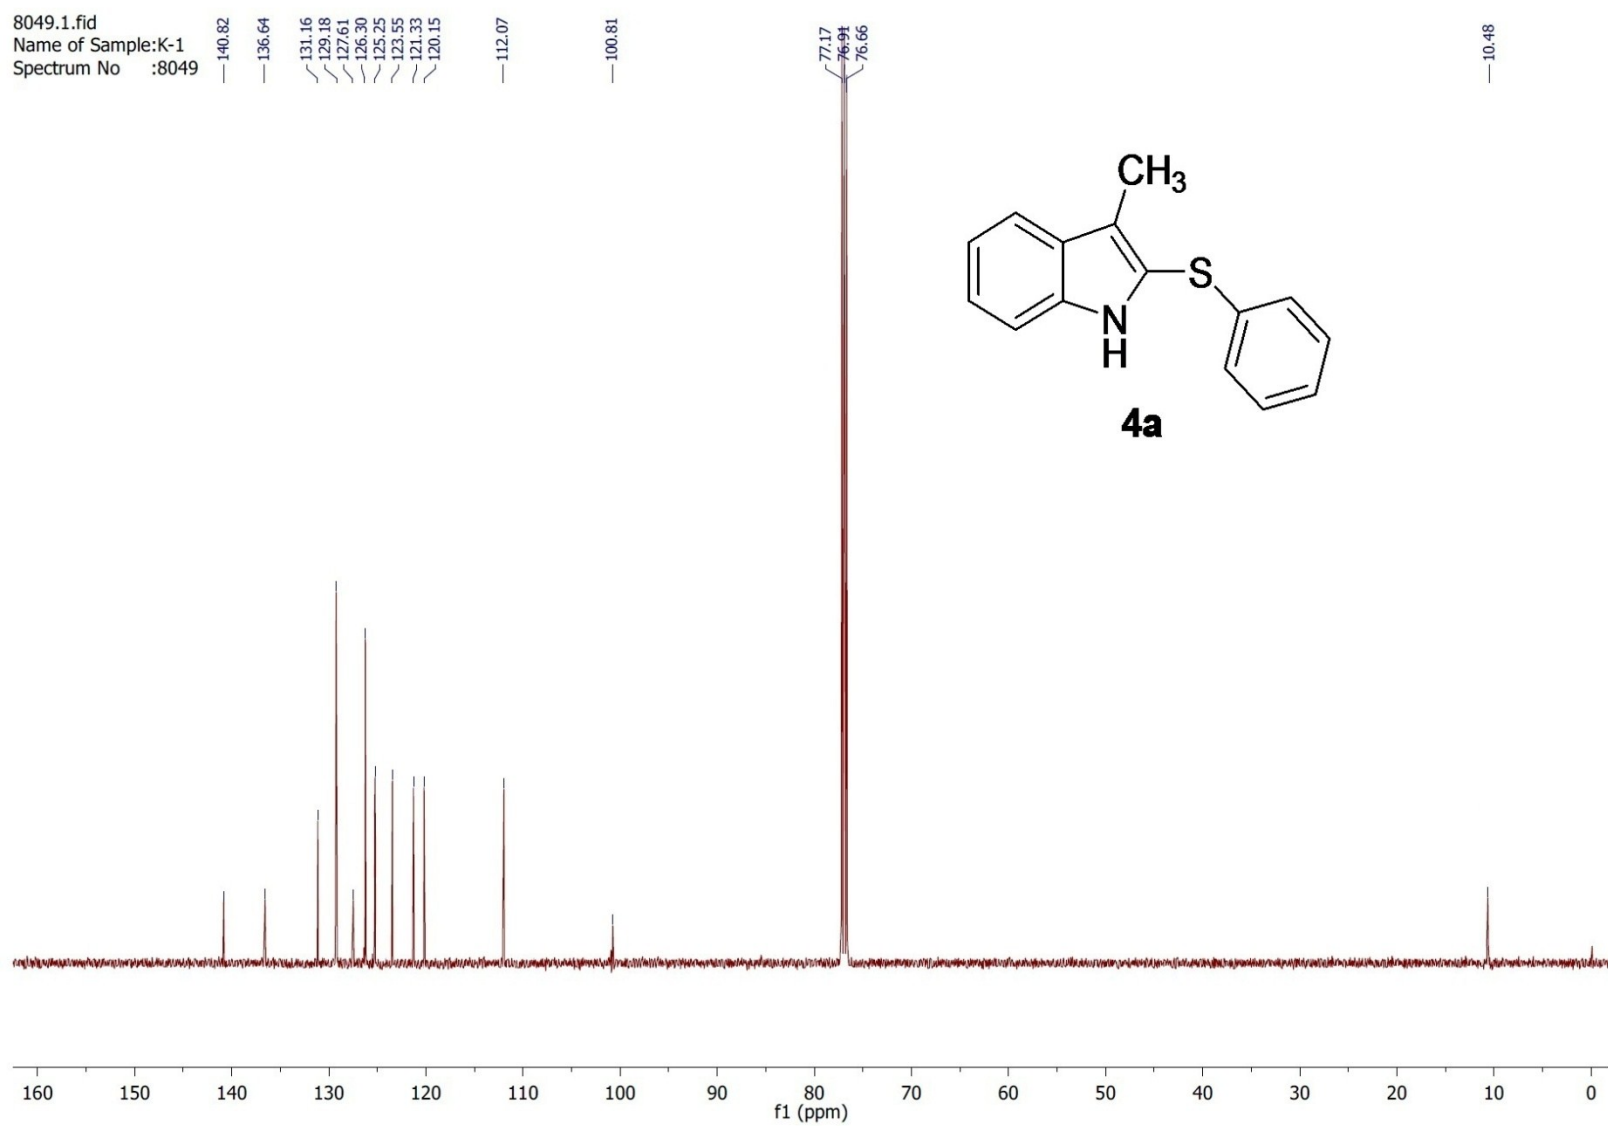

$^1\text{H}$  NMR of compound **Ha** ( $\text{CDCl}_3$ , 400 MHz)

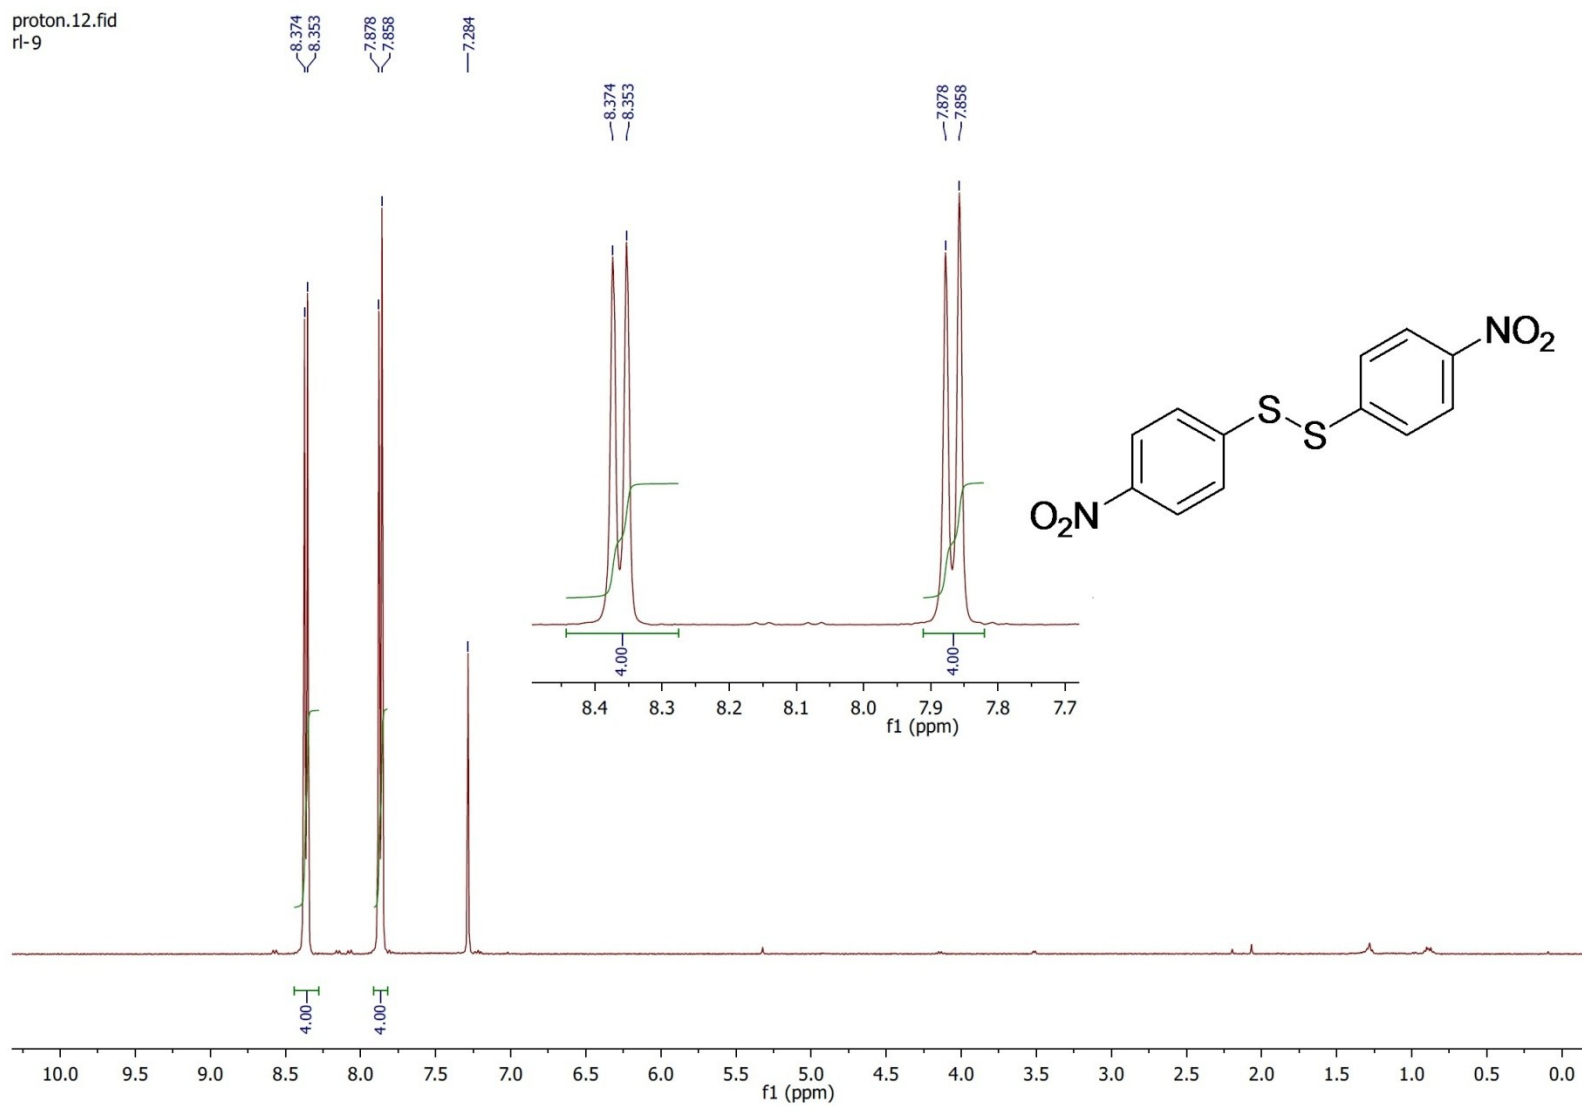

Supplement: c5ra24851e1.pdf [file c5ra24851e1.pdf]
